# Supplementary material for: Selective synthesis of formamides, 1,2-bis(N-heterocyclic)ethanes and methylamines from cyclic amines and CO2/H2 catalyzed by an ionic liquid–Pd/C system
Source: Royal Society of Chemistry journal article supplement (doi:10.1039/c9sc03242h), 2019-01-01
Supplement: c9sc03242h1.pdf [file c9sc03242h1.pdf]

## Supplementary Information for

### **Selective Synthesis of Formamides, 1,2-Bis(N-heterocyclic)ethanes and Methylamines from Cyclic Amines and CO<sub>2</sub>/H<sub>2</sub> Catalyzed by Ionic Liquid-Pd/C system**

*Ruipeng Li<sup>a,b</sup>, Yanfei Zhao<sup>a,\*</sup>, Huan Wang<sup>a,b</sup>, Junfeng Xiang<sup>a</sup>, Yunyan Wu<sup>a,b</sup>, Bo Yu<sup>a</sup>, Buxing Han<sup>a,b,c</sup> & Zhimin Liu<sup>a,b,c,\*</sup>*

<sup>a</sup>Beijing National Laboratory for Molecular Sciences, Key Laboratory of Colloid, Interface and Thermodynamics, CAS Research, Institute of Chemistry, Chinese Academy of Sciences, Beijing 100190, China. <sup>b</sup>University of Chinese Academy of Sciences, Beijing 100049, China. <sup>c</sup>Physical Science Laboratory, Huairou National Comprehensive Science Center.

E-mail: liuzm@iccas.ac.cn, lianyi302@iccas.ac.cn

**Materials.** 1-Butyl-3-methylimidazolium chloride ([BMIm][Cl]), 1-butyl-3-methylimidazolium tetrafluoroborate ([BMIm][BF<sub>4</sub>]), 1-butyl-3-methylimidazolium hexafluorophosphate ([BMIm][PF<sub>6</sub>]), 1-butyl-3-methylimidazolium bis((trifluoromethyl)sulfonyl)imide ([BMIm][NTf<sub>2</sub>]), and 1-hexyl-3-methylimidazolium tetrafluoroborate ([HMIm][BF<sub>4</sub>]) were purchased from Lanzhou Institute of Chemical Physics, Chinese Academy of Sciences. CO<sub>2</sub> and H<sub>2</sub> was supplied by Beijing Analytical Instrument Factory with a purity of 99.995%. And various substrates of N-containing substrates were obtained commercially from J&K Scientific Ltd. and Innochem Science & Technology Co., Ltd. respectively. The other chemicals were purchased from Beijing Chemical Reagent Company. All chemicals were of analytical grade and used as received. “IL” in this word represents [BMIm][BF<sub>4</sub>] if there were no special explanation.

**General procedure for IL adsorption on Pd/C.** The adsorption of IL on Pd/C was performed under the above experimental conditions. After the adsorption, the mixture was centrifuged, washed with ethanol for several times, and then dried under vacuum at 60 °C overnight. The amount of IL adsorbed at different reaction temperature was determined by TG analysis. TG measurements were performed on a thermal analyzer (PerkinElmer TGA 4000) in N<sub>2</sub> with a heating rate of 10 °C /min.

**Characterization.** The XPS data were processed using XPSPEAK41. The Pd 3d core level XPS pattern was fitted according to asymmetric peaks with 3:2 peak area ratio and 5.3 eV peak separation. The work-up of raw XAFS data to k-space and Fourier transformed R-space involved energy calibration, background subtraction, and  $\mu_0$  fitting. All data was first processed using a consistent methodology of background subtraction, conversion to k-space. Then, k<sup>2</sup>-weighting data in the k space ranging from 3.12 to 12.2 Å<sup>-1</sup> for Pd was Fourier transformed (FT) to R space.

**DFT calculation.** Gaussian calculation was performed to verify that the length of C-C bond in **3a** to become longer. This may be responsible for the cleavage of C-C bond in **3a** to give **4a**. All calculations were performed with the Gaussian 09 package. Geometry optimizations and frequency calculations were carried out at the B3LYP/6-311+G(d,p) level at 298.15 K.

**Table S1.** Reaction conditions screening <sup>a</sup>.

| Entry           | Temperature/ °C | Solvent/Additive                                          | Yield (%) <sup>e</sup> |           |           |
|-----------------|-----------------|-----------------------------------------------------------|------------------------|-----------|-----------|
|                 |                 |                                                           | <b>2a</b>              | <b>3a</b> | <b>4a</b> |
| 1               | 130             | [BMIm][BF <sub>4</sub> ]                                  | 62                     | 18        | 19        |
| 2               | 140             | [BMIm][BF <sub>4</sub> ]                                  | 54                     | 21        | 24        |
| 3               | 150             | [BMIm][BF <sub>4</sub> ]                                  | 38                     | 27        | 33        |
| 4               | 160             | [BMIm][BF <sub>4</sub> ]                                  | 11                     | 6         | 82        |
| 5 <sup>b</sup>  | 160             | [BMIm][BF <sub>4</sub> ] + CsF                            | 27                     | 23        | 45        |
| 6 <sup>b</sup>  | 160             | [BMIm][BF <sub>4</sub> ] + K <sub>2</sub> CO <sub>3</sub> | 26                     | 22        | 51        |
| 7 <sup>c</sup>  | 160             | [BMIm][BF <sub>4</sub> ] + Ethanol                        | 99                     | 0         | 0         |
| 8 <sup>c</sup>  | 160             | [BMIm][BF <sub>4</sub> ] + Octane                         | 6                      | 37        | 56        |
| 9 <sup>d</sup>  | 160             | [BMIm][BF <sub>4</sub> ] + [BMIm][Cl] (1:2)               | 16                     | 53        | 30        |
| 10 <sup>d</sup> | 160             | [BMIm][BF <sub>4</sub> ] + [BMIm][Cl] (1:1)               | 28                     | 41        | 30        |

<sup>a</sup>Reaction conditions: substrate (0.5 mmol), Pd/C (20 mg), [BMIm][BF<sub>4</sub>] (5 mmol), H<sub>2</sub> (3 MPa), total pressure of 10 MPa, 160 °C, 6 h. <sup>b</sup>Base (0.1 mmol). <sup>c</sup>IL (2.5 mmol), solvent (2.5 mL) H<sub>2</sub> (3 MPa), total pressure of 8 MPa, 3 h.

<sup>d</sup>Substrate (0.5 mmol), Pd/C (20 mg), the total amount of [BMIm][BF<sub>4</sub>] and [BMIm][Cl] was 5 mmol, while the ratio in brackets was molar ratio, H<sub>2</sub> (5 MPa), total pressure of 8 MPa, 4 h. <sup>e</sup>Yield was determined by GC using trimethoxybenzene as internal standard.

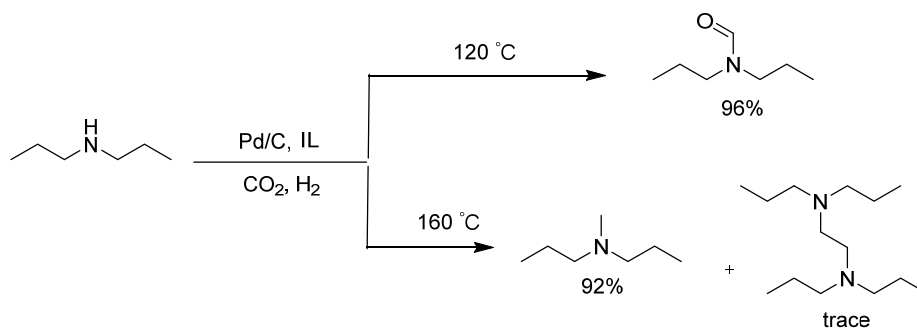

**Scheme S1.** Reactions of dipropylamine with CO<sub>2</sub> and H<sub>2</sub> at 120 °C and 160 °C.

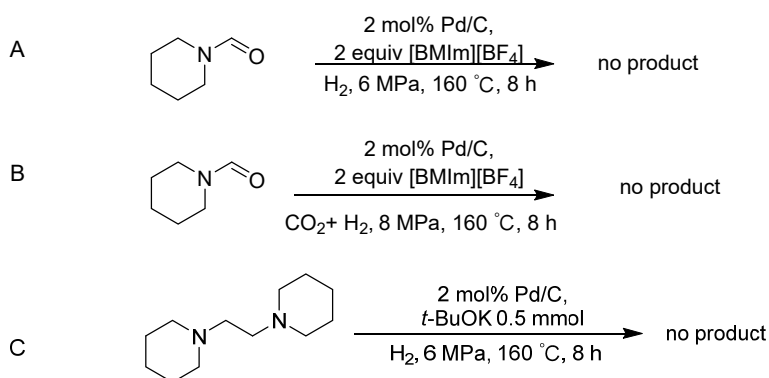

**Scheme S2.** Control experiments: (A) **2a** was treated with H<sub>2</sub>. (B) **2a** was treated with H<sub>2</sub> and CO<sub>2</sub>. (C) **3a** was treated with H<sub>2</sub> in the presence of base *t*-BuOK without IL.

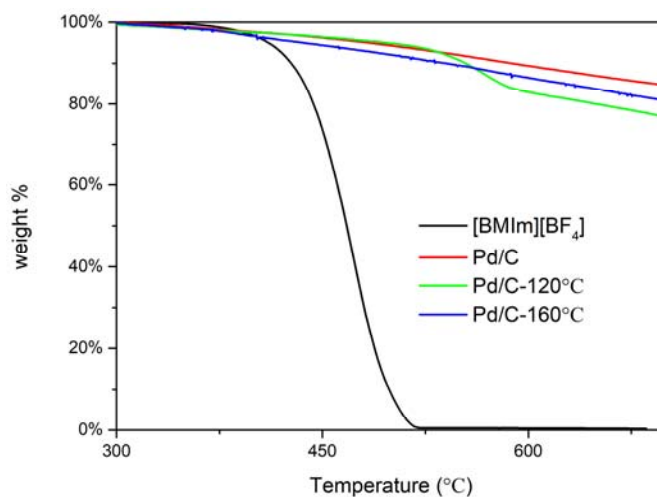

**Figure S1.** TG plots of Pd/C and IL-Pd/C with different absorption capacity.

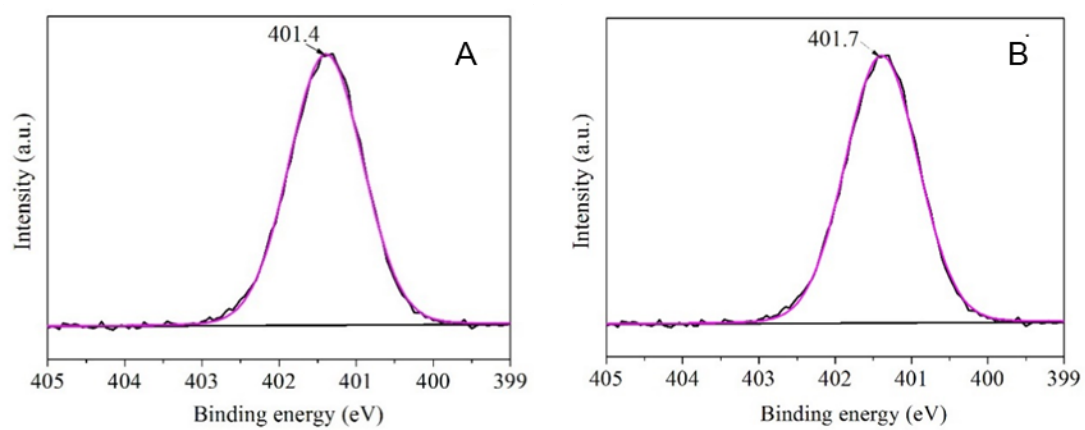

**Figure S2.** N1s XPS spectra of (a) IL-C and (b) IL-Pd/C.

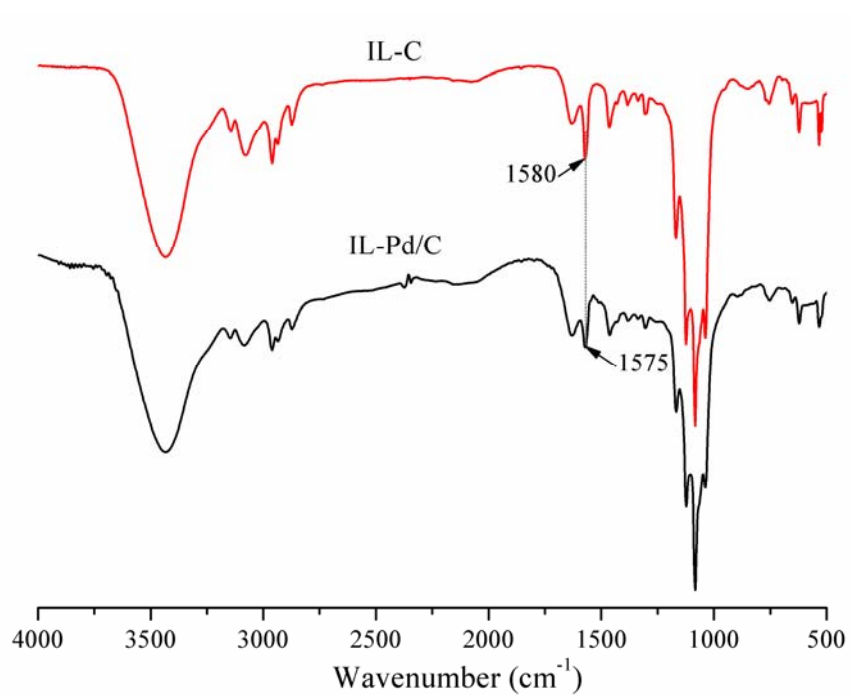

**Figure S3.** FTIR spectra of IL-C and IL-Pd/C.

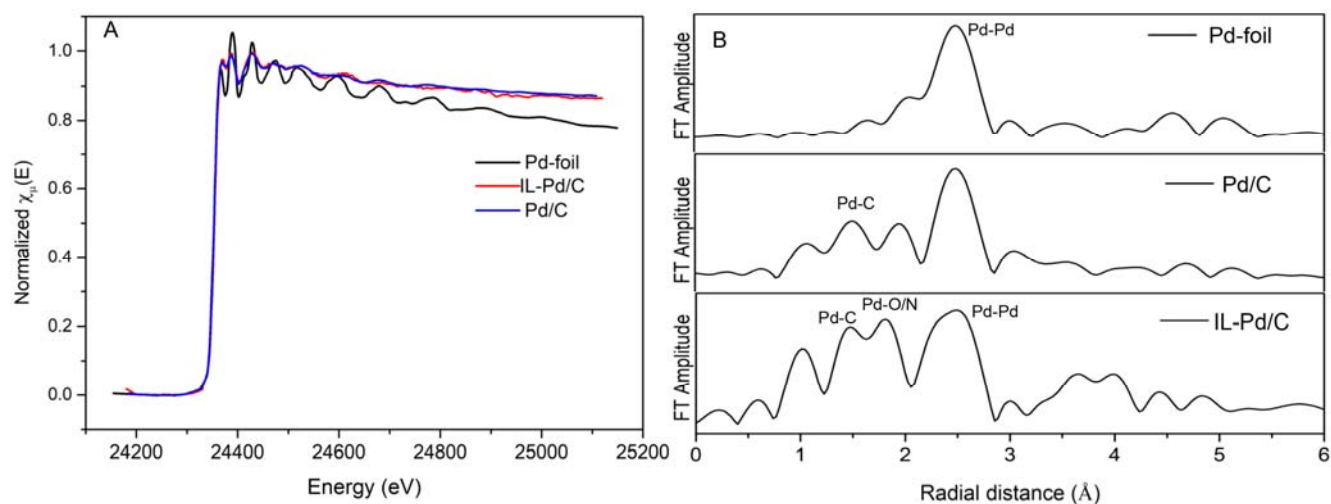

**Figure S4.** Normalized Pd-K-edge spectra of Pd-foil, Pd/C and Pd/C with [BMIm][BF<sub>4</sub>] (a). Fourier transforms FT( $k^3\chi_{\mu}(K)$ ) for Pd-foil, Pd/C and IL-Pd/C.

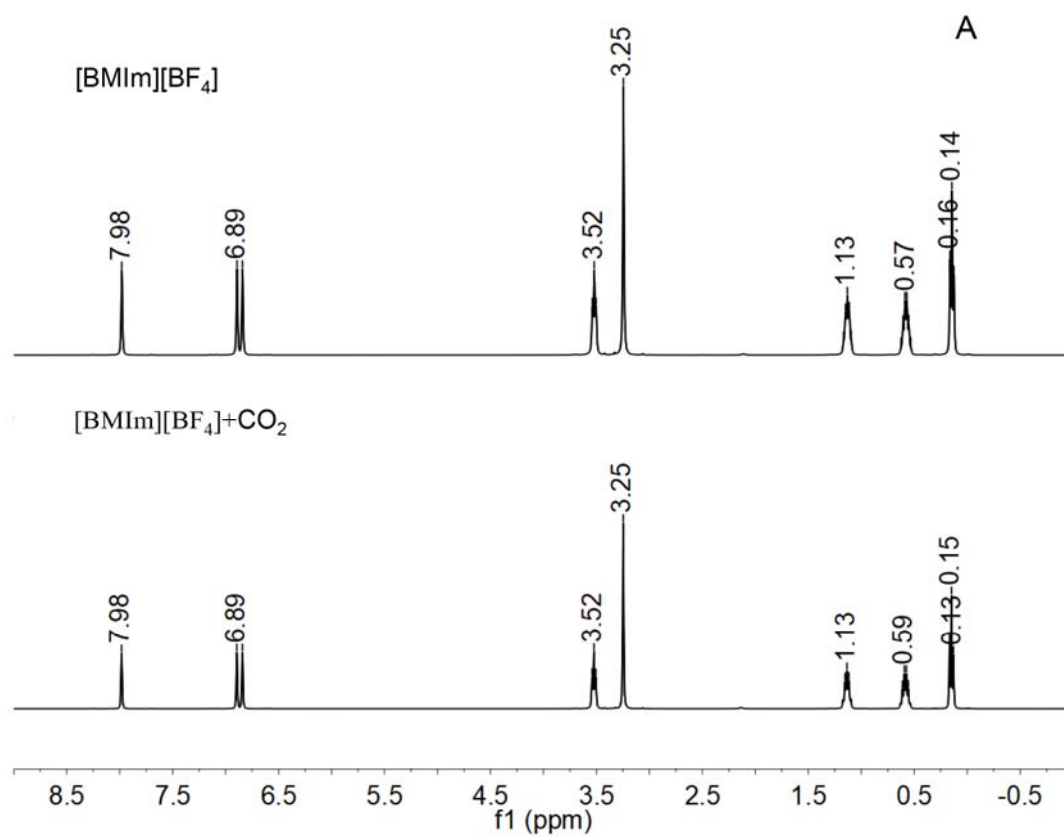

[BMIm][BF<sub>4</sub>]

B

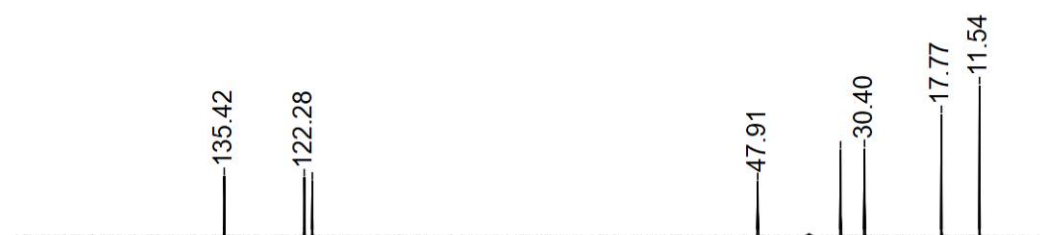

[BMIm][BF<sub>4</sub>]+CO<sub>2</sub>

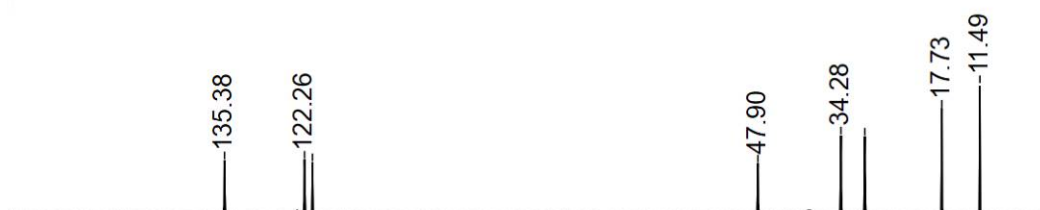

70 150 130 110 90 80 70 60 50 40 30 20 10 (f1 (ppm))

[BMIm][BF<sub>4</sub>]

C

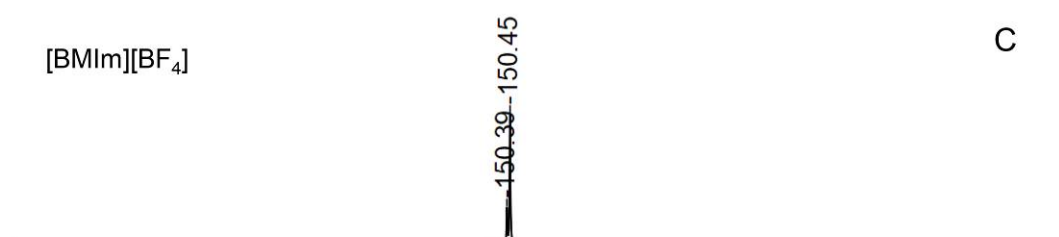

[BMIm][BF<sub>4</sub>]+CO<sub>2</sub>

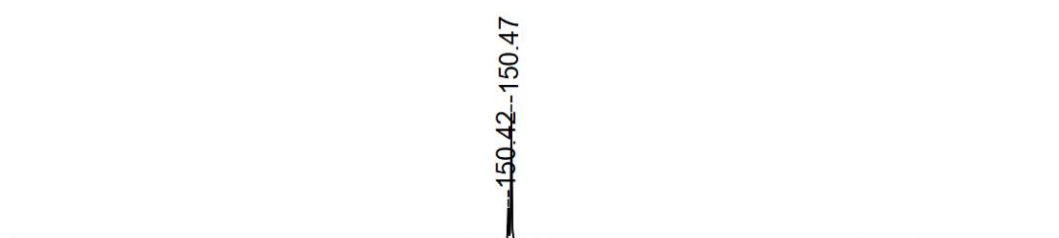

-143 -145 -147 -149 -151 -153 -155 -157 -159 (f1 (ppm))

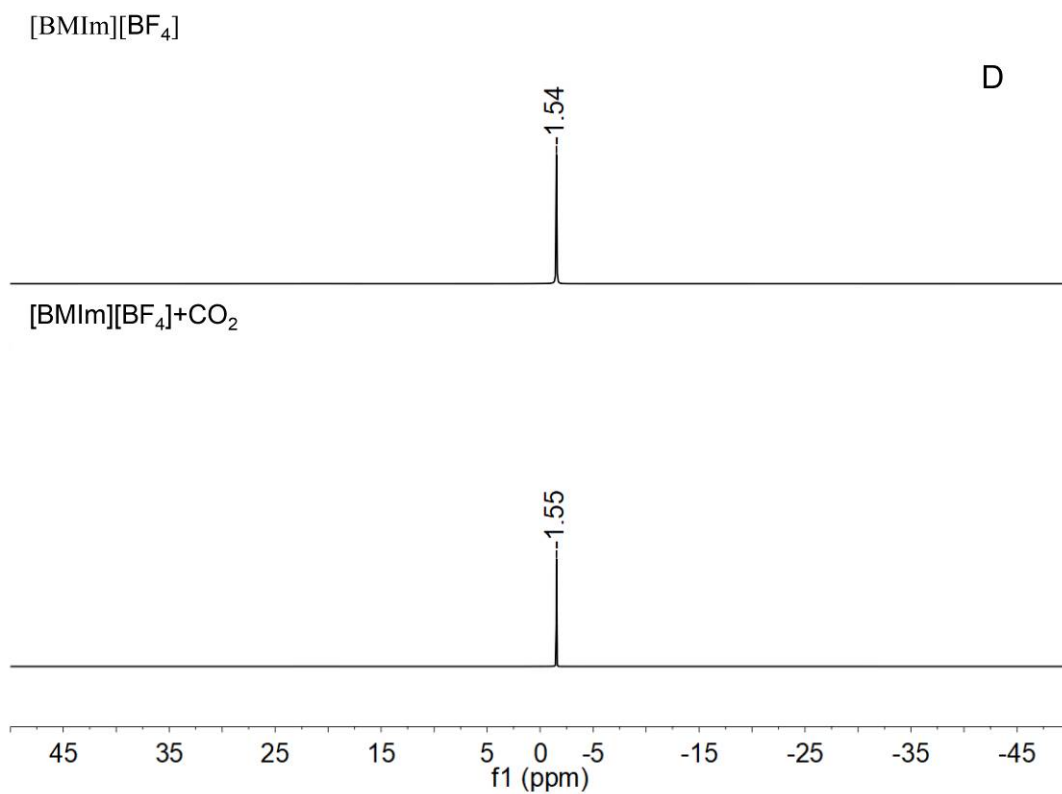

**Figure S5.** <sup>1</sup>H, <sup>13</sup>C, <sup>19</sup>F and <sup>11</sup>B NMR spectra of [BMIm][BF<sub>4</sub>] before and after exposing to CO<sub>2</sub>.

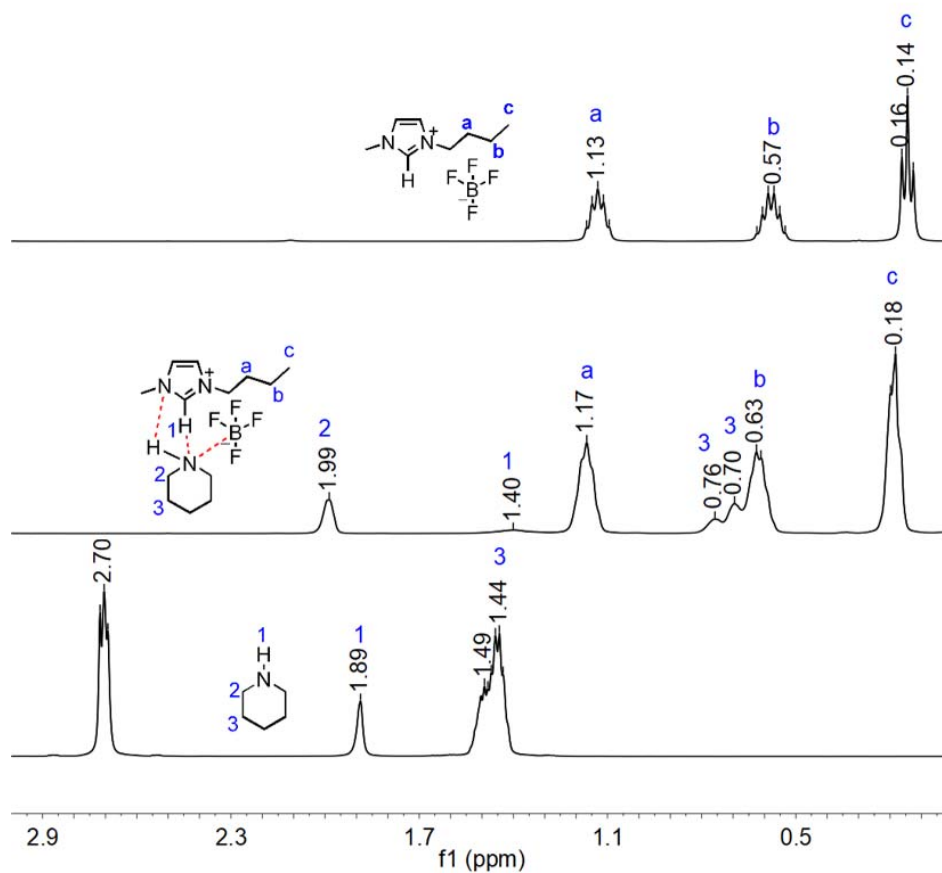

**Figure S6.** <sup>1</sup>H NMR spectra of [BMIm][BF<sub>4</sub>], **1a** and their mixture.

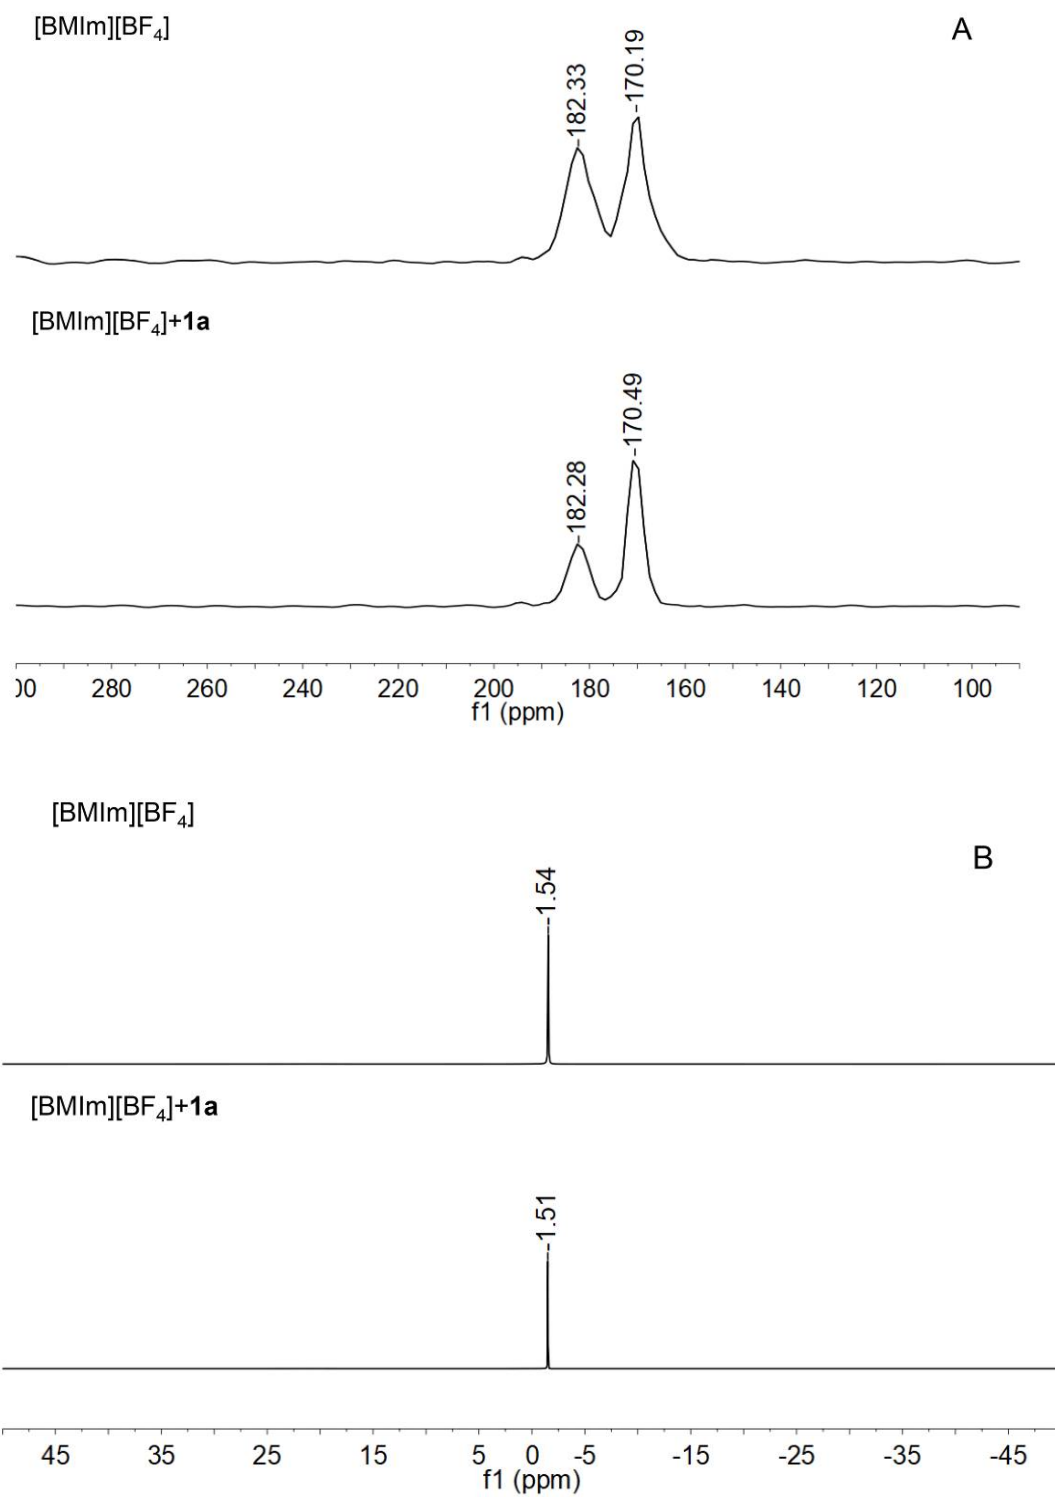

**Figure S7.** <sup>15</sup>N (a) and <sup>11</sup>B (b) NMR spectra of [BMIm][BF<sub>4</sub>] and the mixture of **1a** and [BMIm][BF<sub>4</sub>].



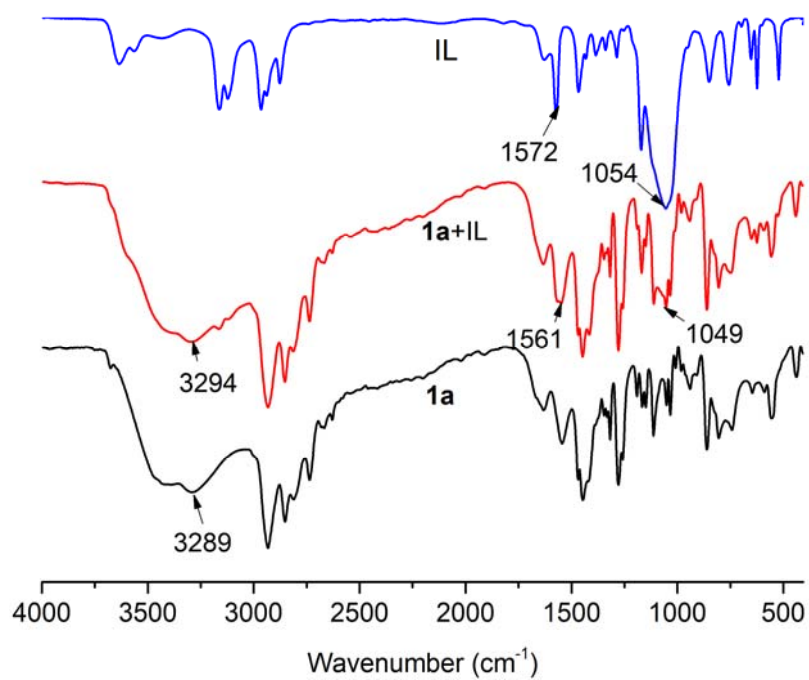

**Figure S8.** FTIR spectra of piperidine (**1a**), [BMIm][BF<sub>4</sub>] (IL) and their mixture (**1a**+IL).

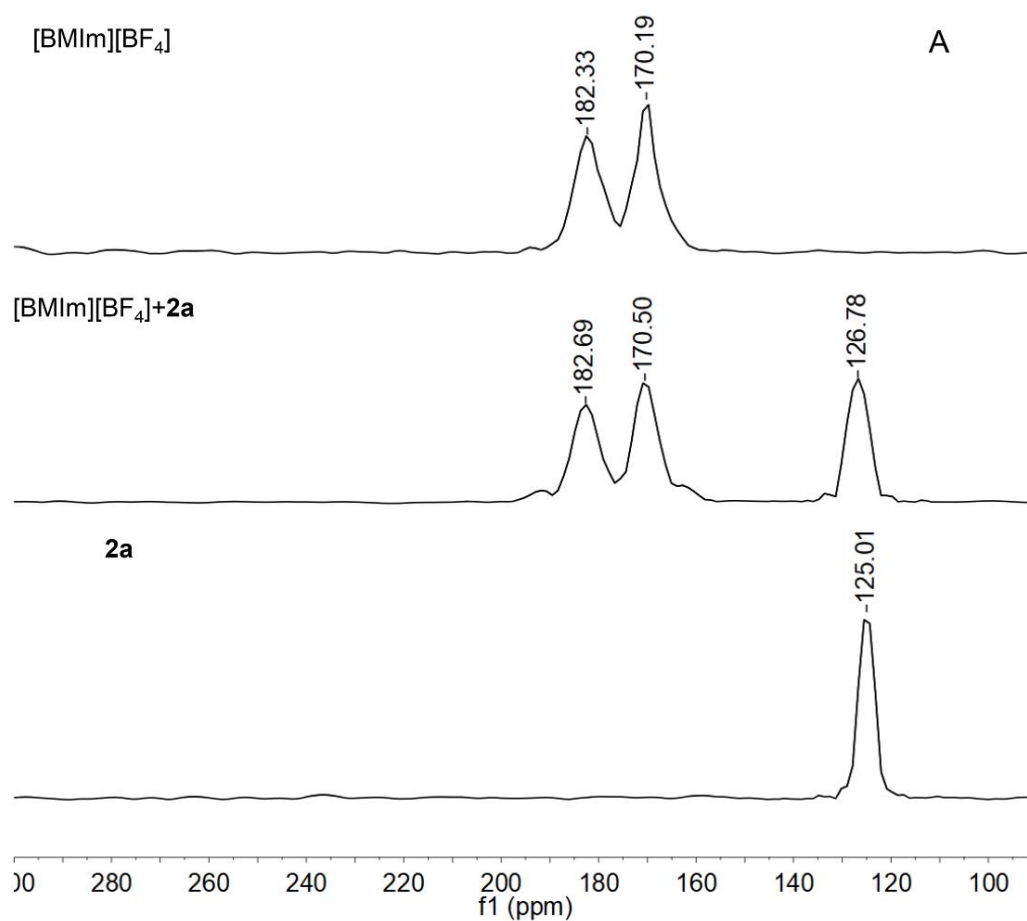



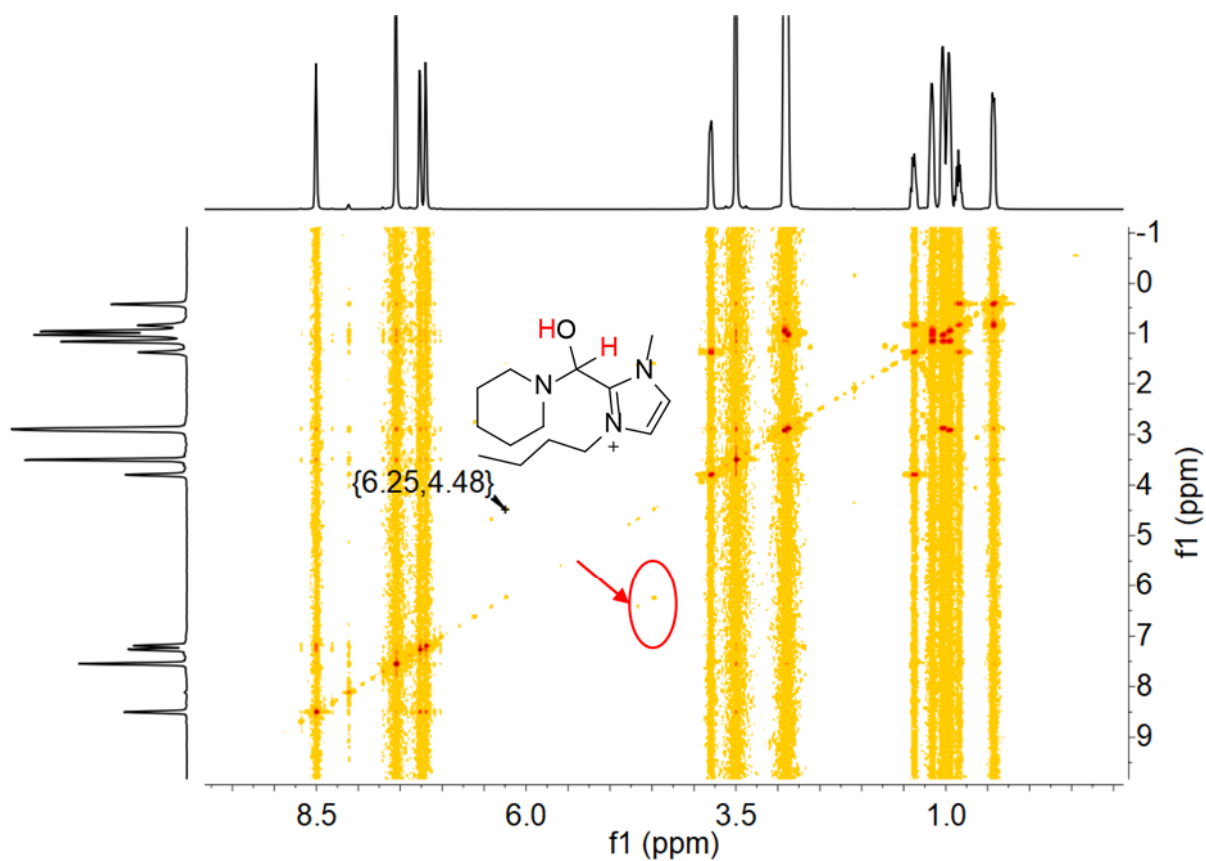

**Figure S10.**  $^1\text{H}$ - $^1\text{H}$  COSY spectrum of the mixture of IL and **2a** together with  $\text{K}_2\text{CO}_3$ .

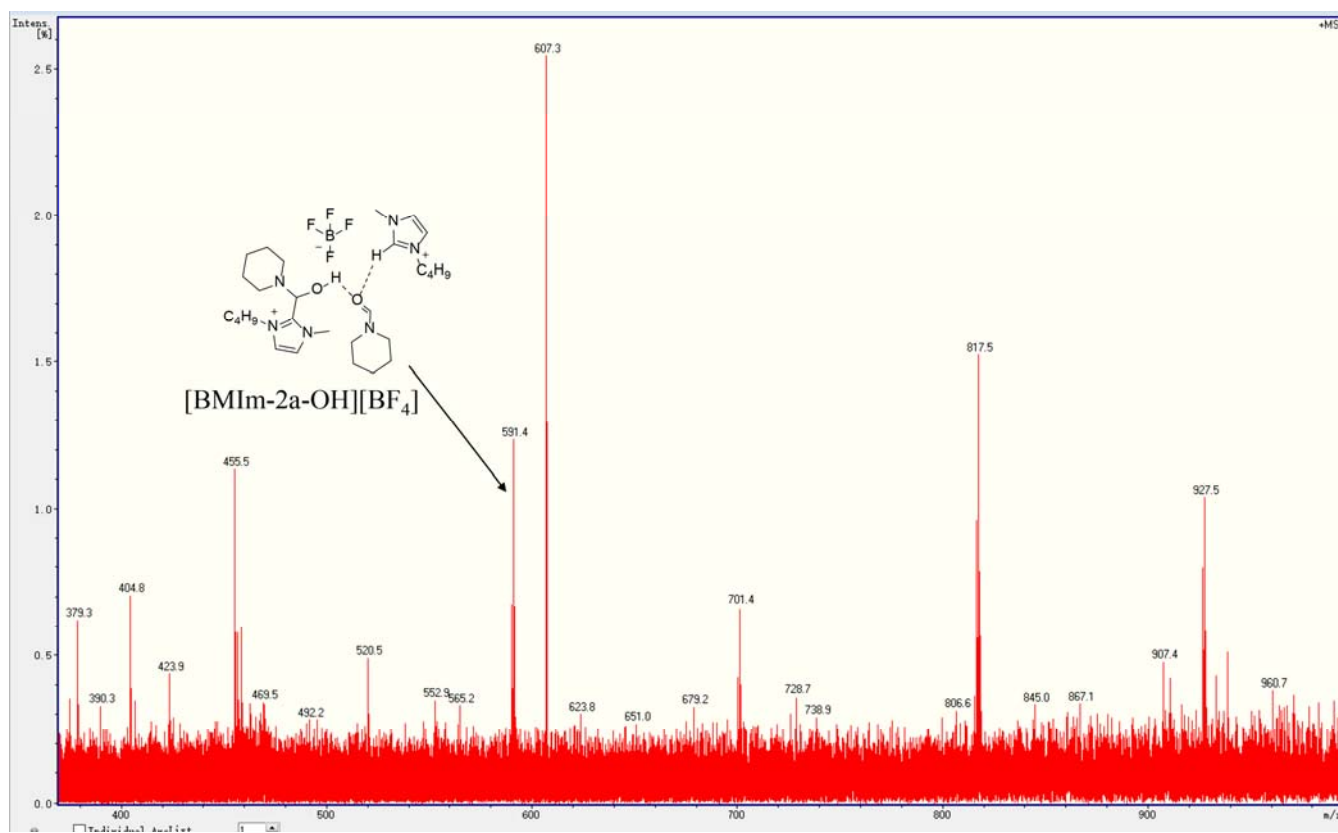

**Figure S11.** Electrospray ionization mass spectrometry (ESI-MS) of the reaction mixture of **2a** with IL with  $\text{K}_2\text{CO}_3$  after 1 h in positive ion mode.

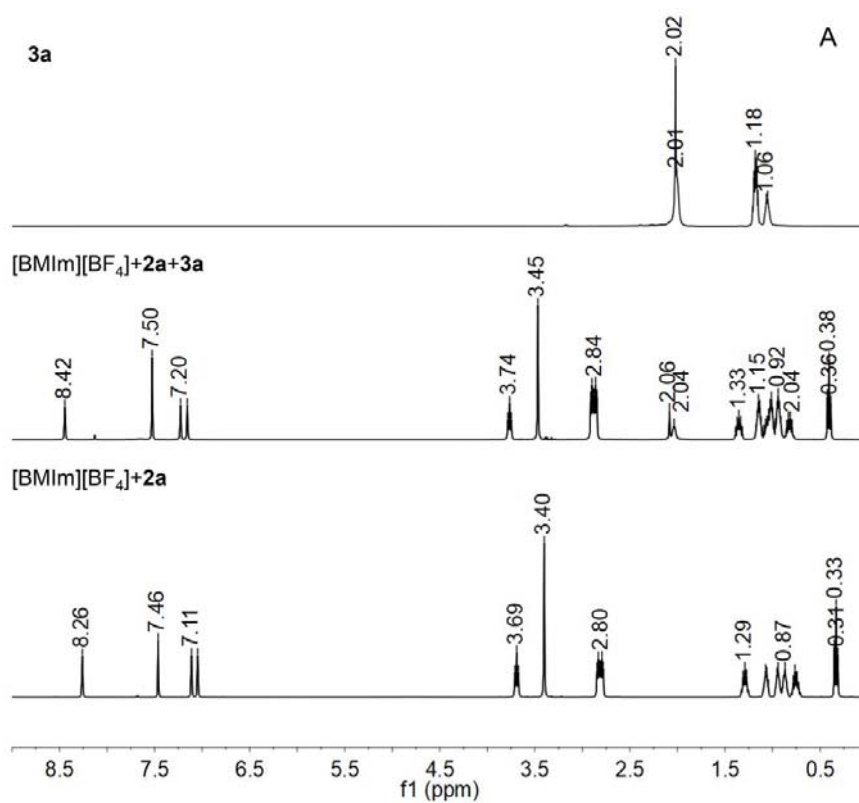

**Figure S12.**  $^1\text{H}$  NMR (A) and  $^{13}\text{C}$  NMR (B) spectra of 1,2-bis(piperidine)ethane (**3a**), the mixture of [BMIm][BF<sub>4</sub>], **2a** and **3a**, and the mixture of **2a** and [BMIm][BF<sub>4</sub>].

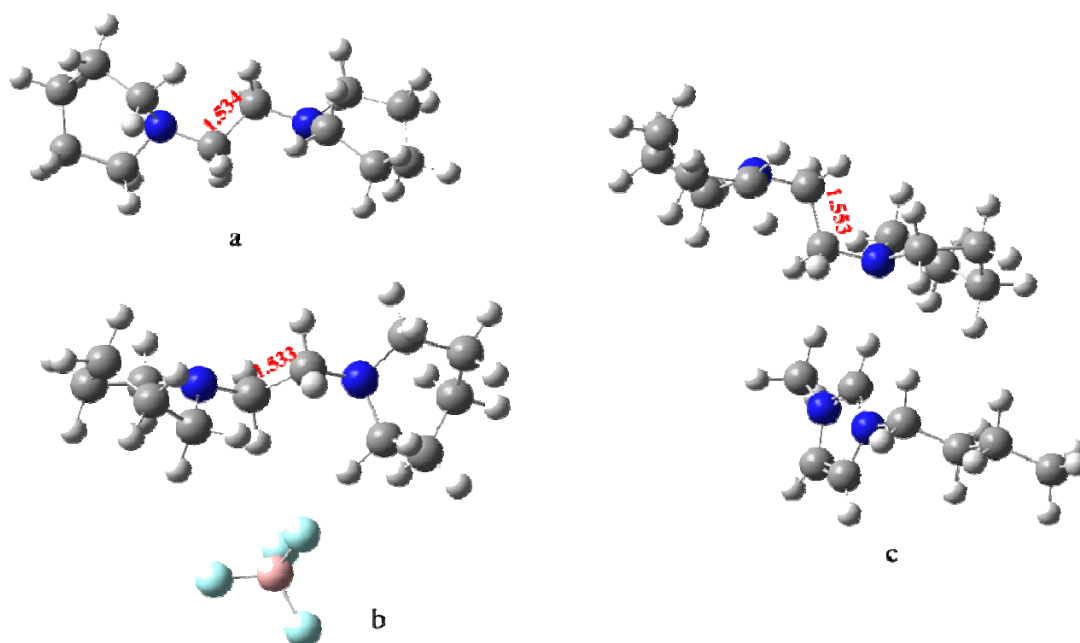

**Figure S13.** The structures of **3a** (a), **3a** with [BF<sub>4</sub>] (b) and with [BMIm] (c). Red word: atom distance (Å).

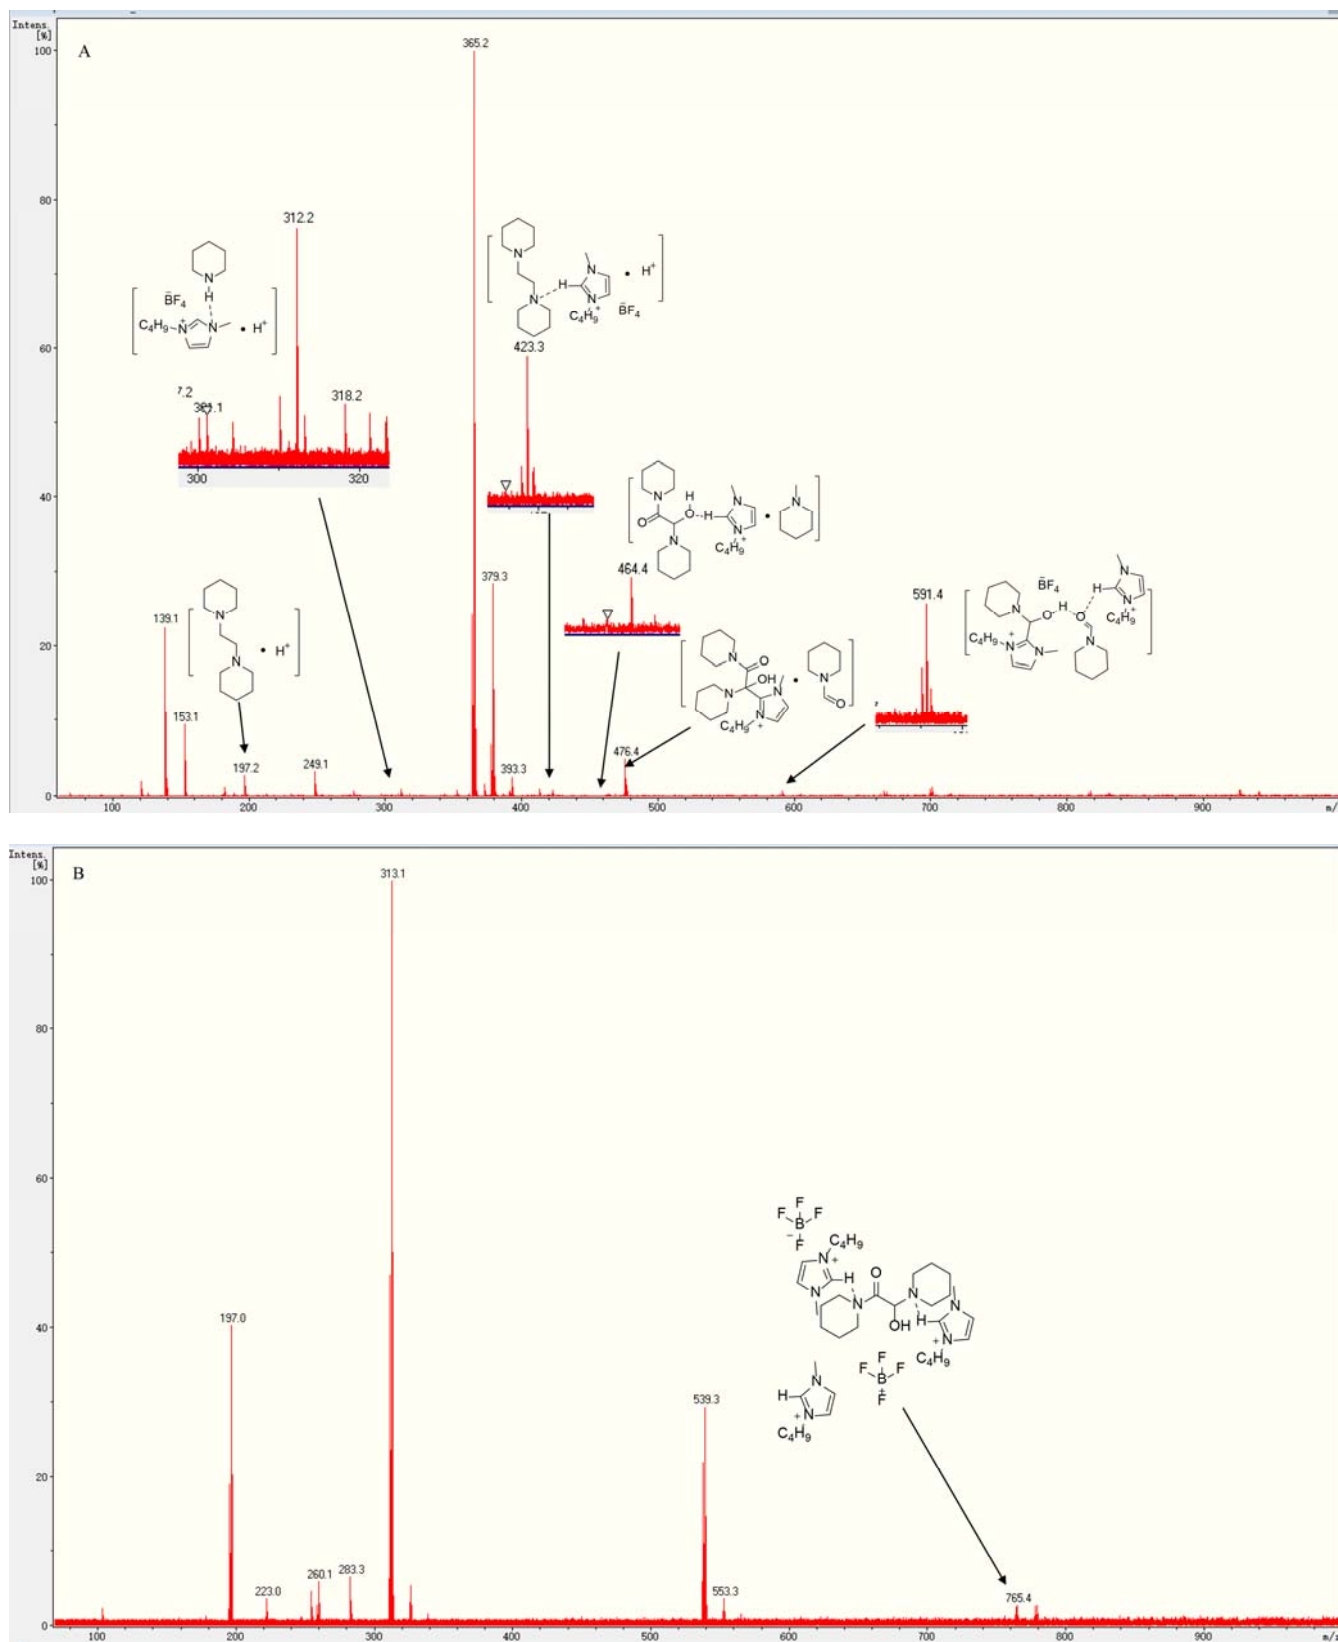

**Figure S14.** ESI-MS analysis of the reaction mixture after 1 h in positive ion mode (A) and negative ion mode (B).

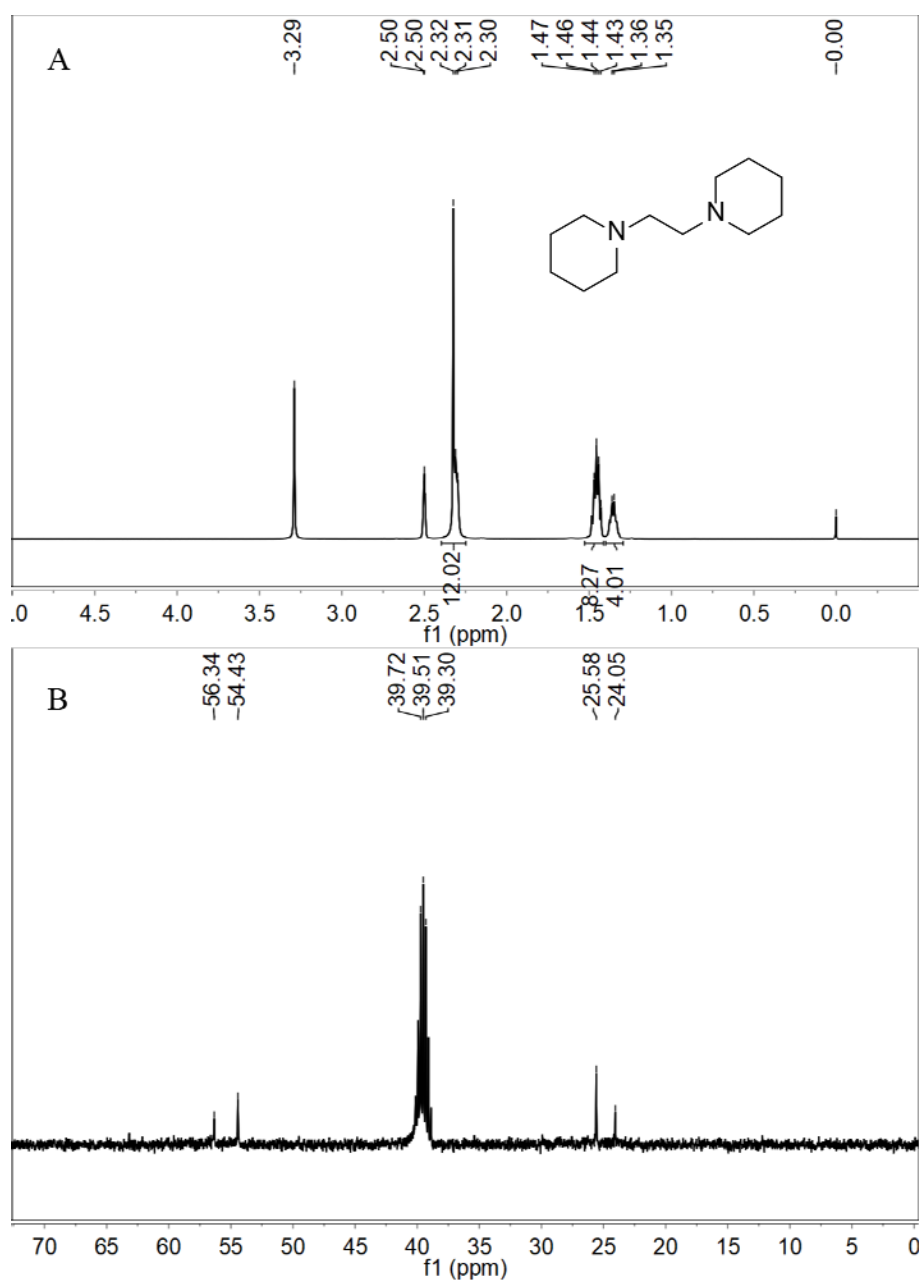

**Figure S15.**  $^1\text{H}$  NMR (A) and  $^{13}\text{C}$  NMR (B) spectra of 1,2-bis(piperidine)ethane.

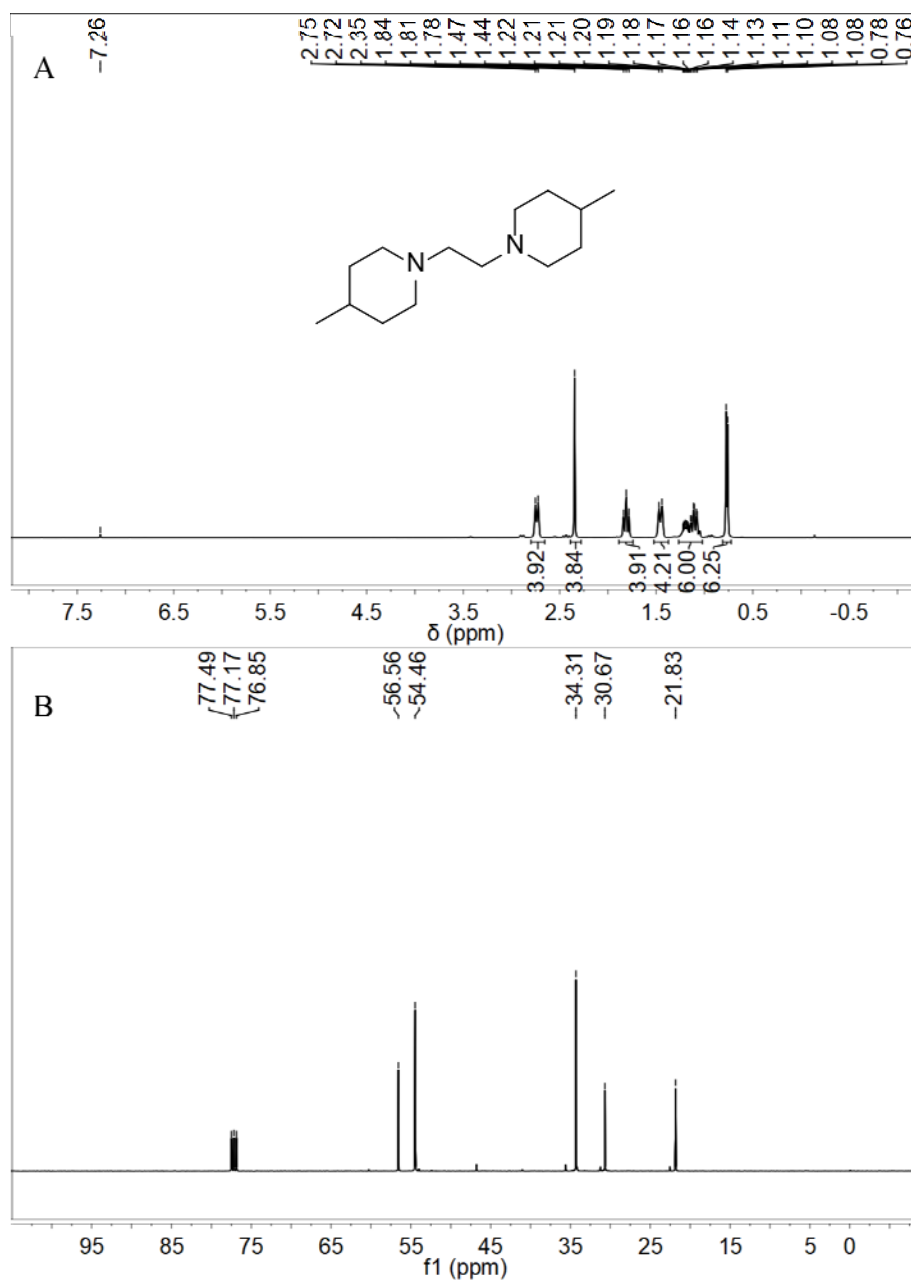

**Figure S16.**  $^1\text{H}$  NMR (A) and  $^{13}\text{C}$  NMR (B) spectra of 1,2-bis(4-methylpiperidin-1-yl)ethane.

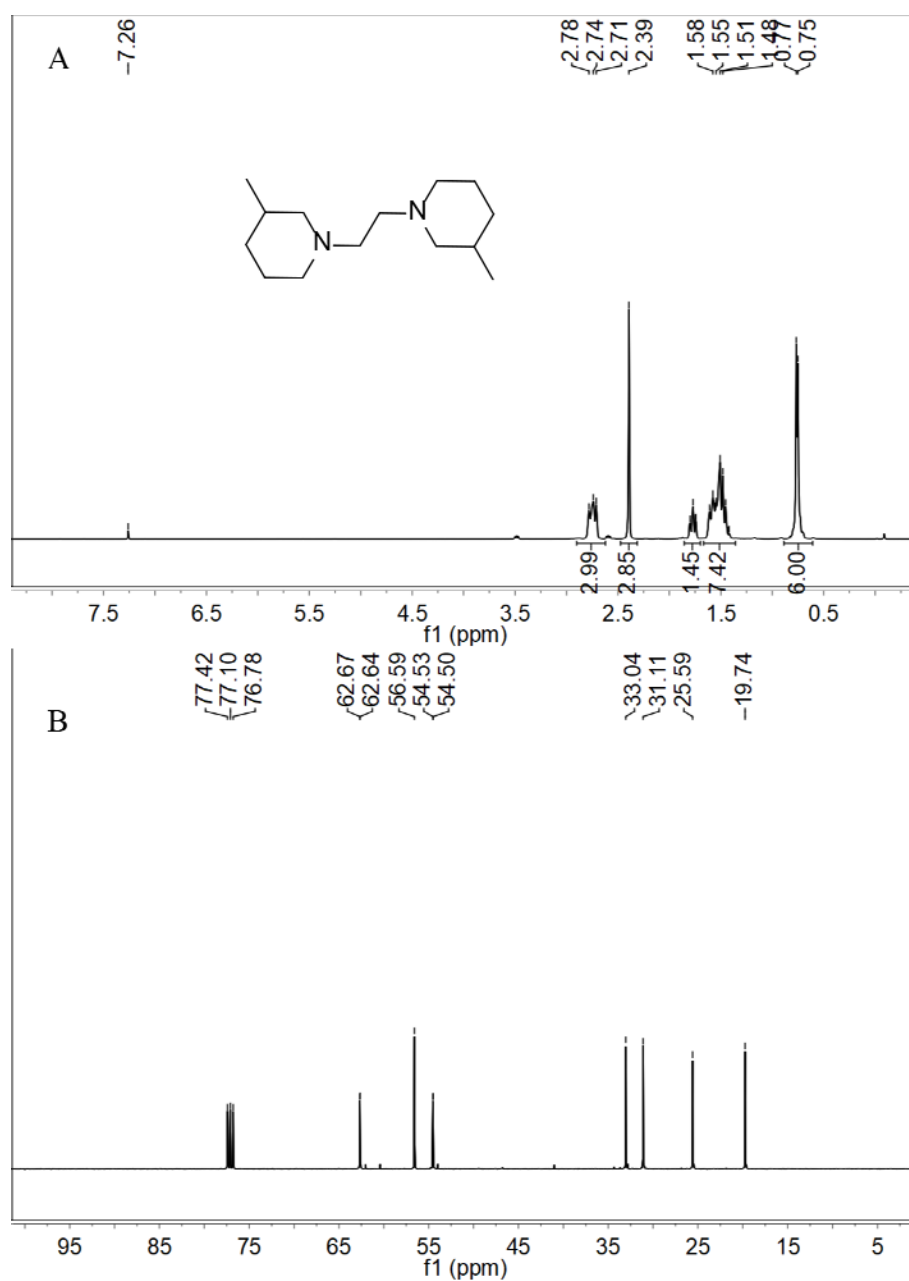

**Figure S17.** <sup>1</sup>H NMR (A) and <sup>13</sup>C NMR (B) spectra of 1,2-bis(3-methylpiperidin-1-yl)ethane.



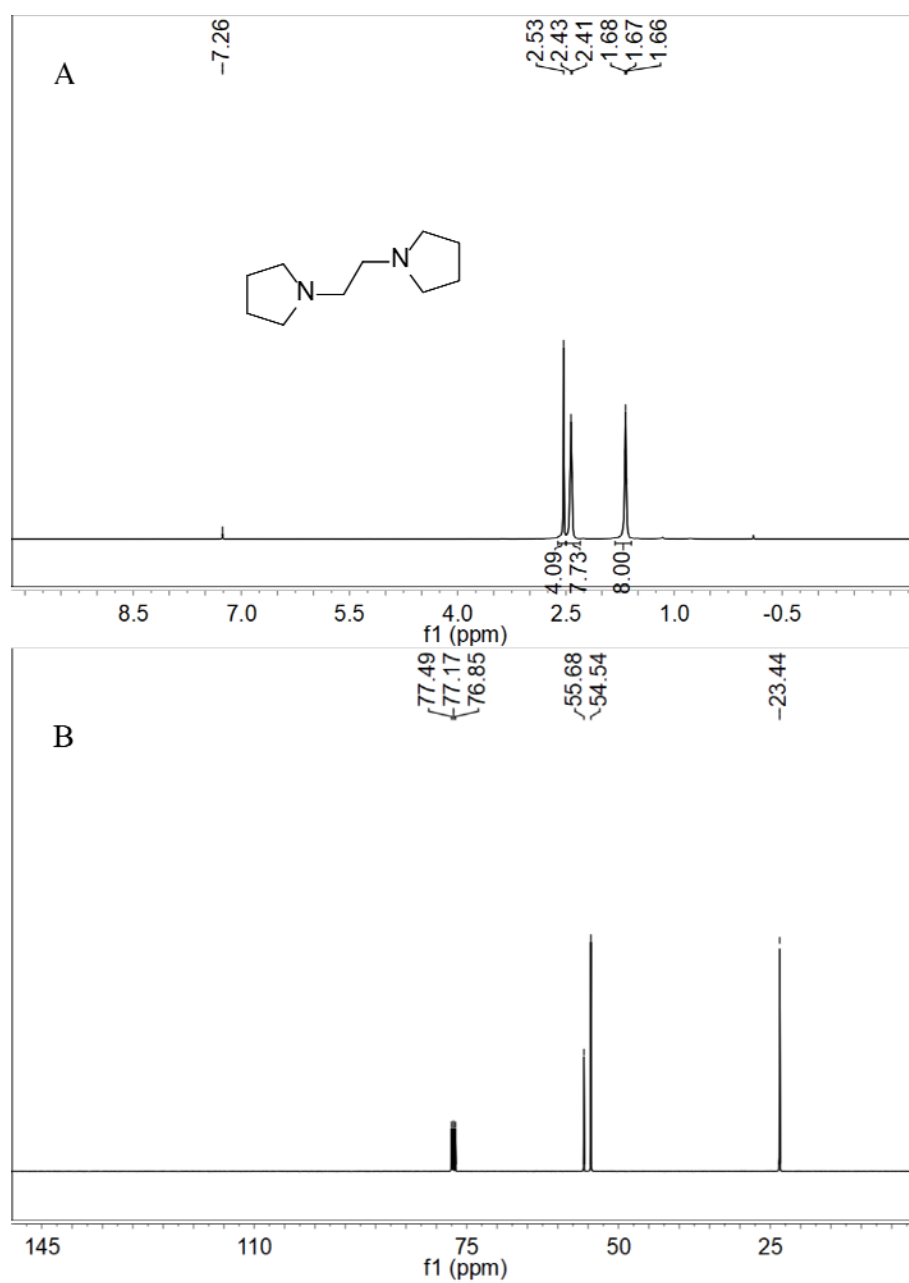

**Figure S18.**  $^1\text{H}$  NMR (A) and  $^{13}\text{C}$  NMR (B) spectra of 1,2-di(pyrrolidin-1-yl)ethane.

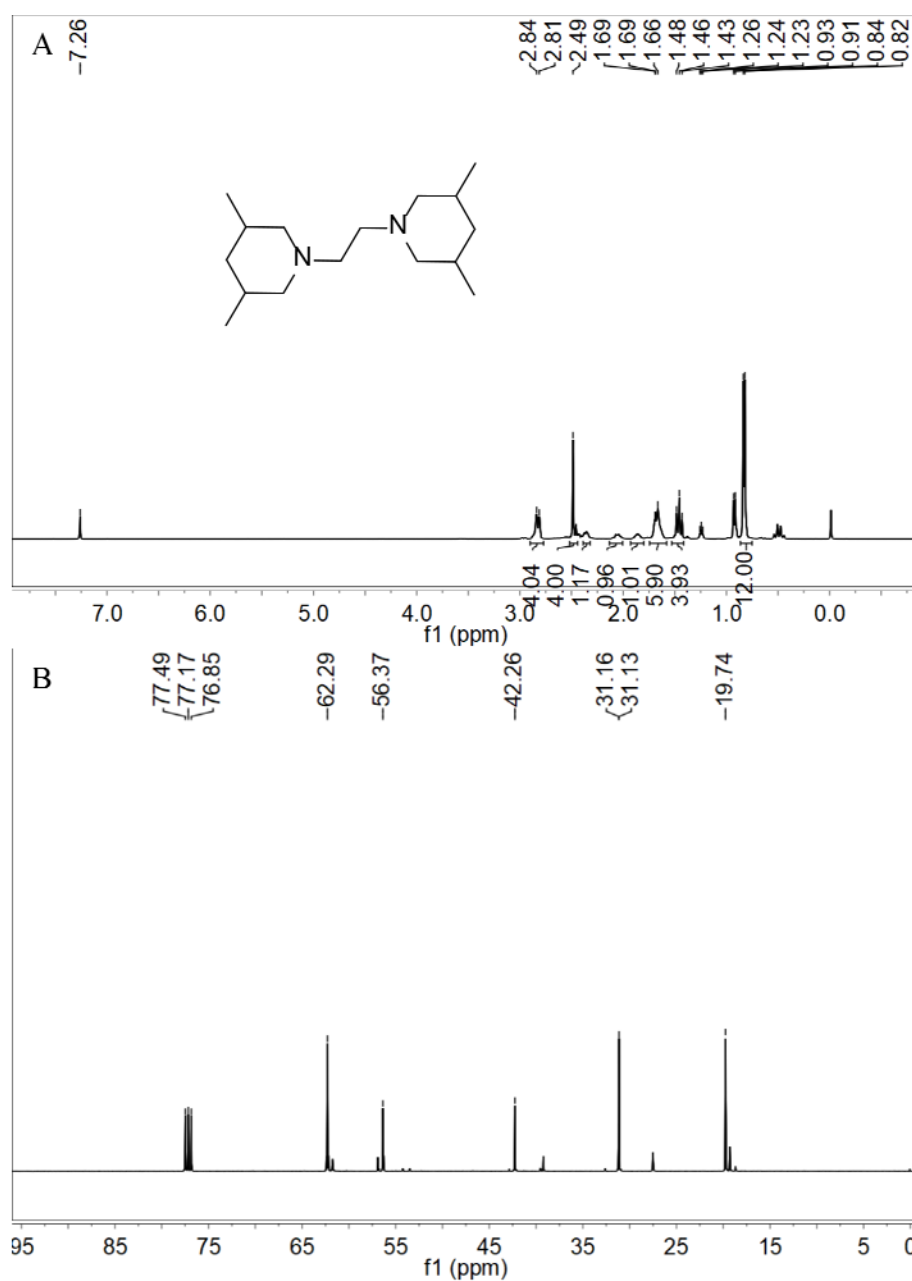

**Figure S19.** <sup>1</sup>H NMR (A) and <sup>13</sup>C NMR (B) spectra of 1,2-bis(3,5-dimethylpiperidin-1-yl)ethane.

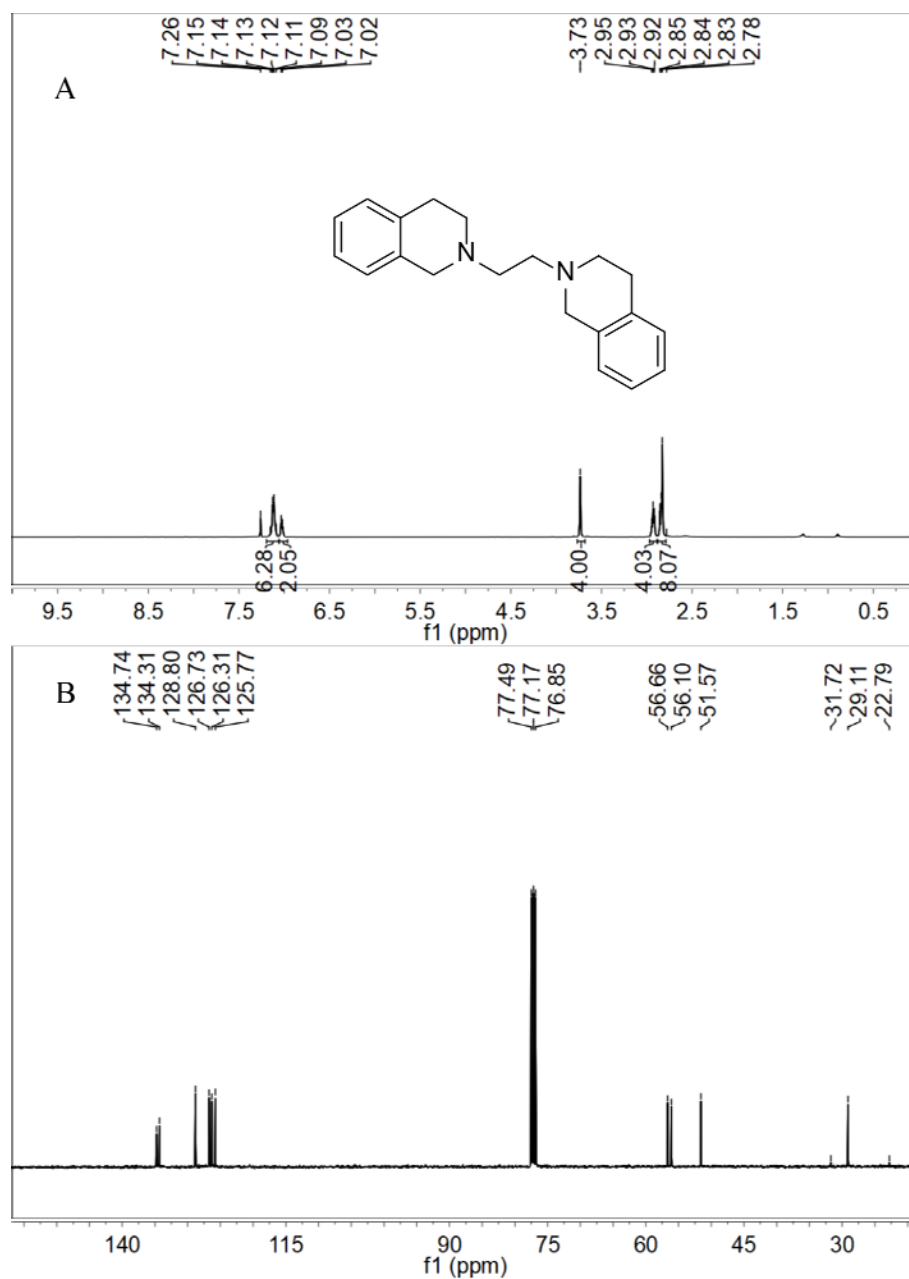

**Figure S20.** <sup>1</sup>H NMR (A) and <sup>13</sup>C NMR (B) spectra of 1,2-bis-(3,4-dihydro-1H-[2]isoquinolyl)-ethane.

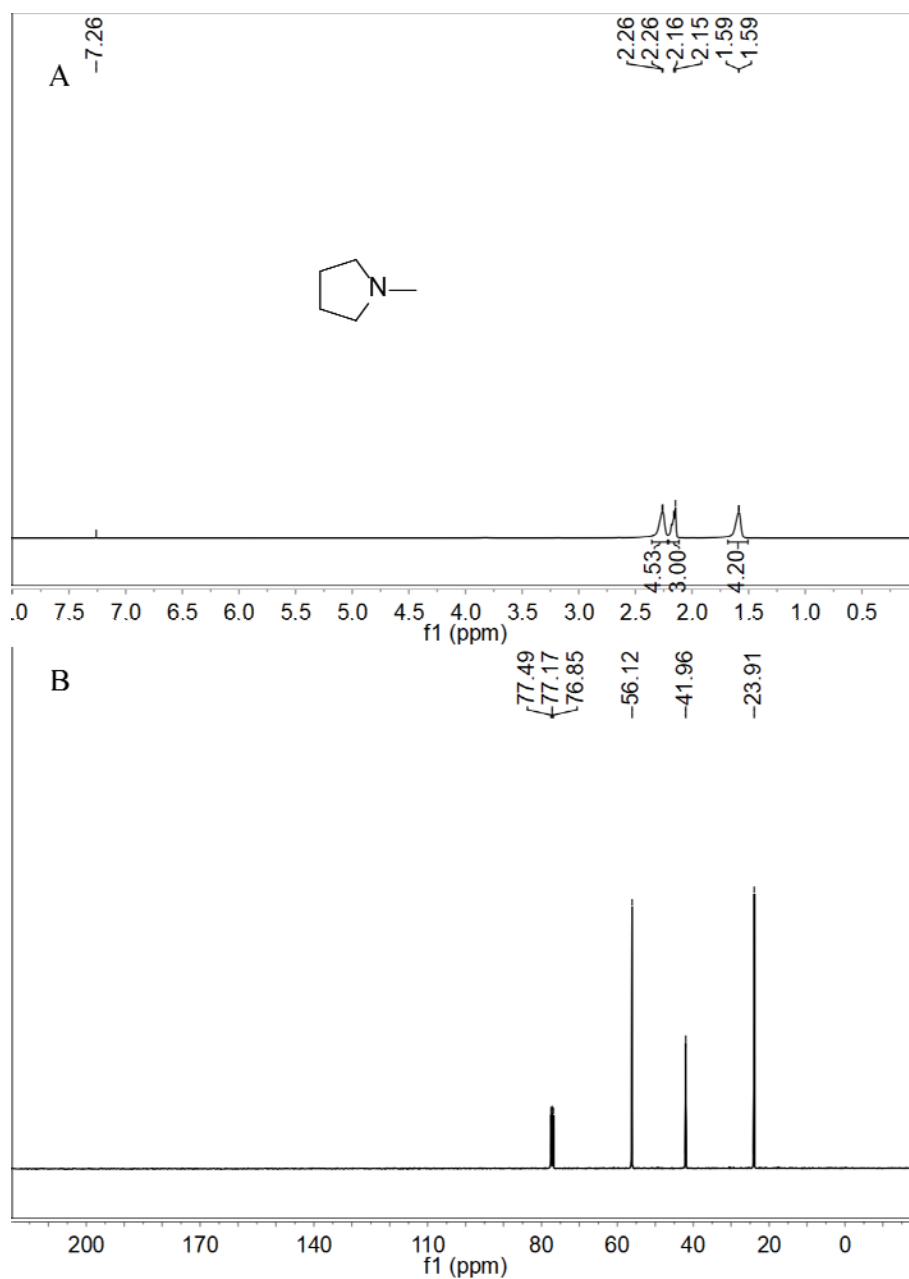

**Figure S21.**  $^1\text{H}$  NMR (A) and  $^{13}\text{C}$  NMR (B) spectra of 1-methylpyrrolidine.

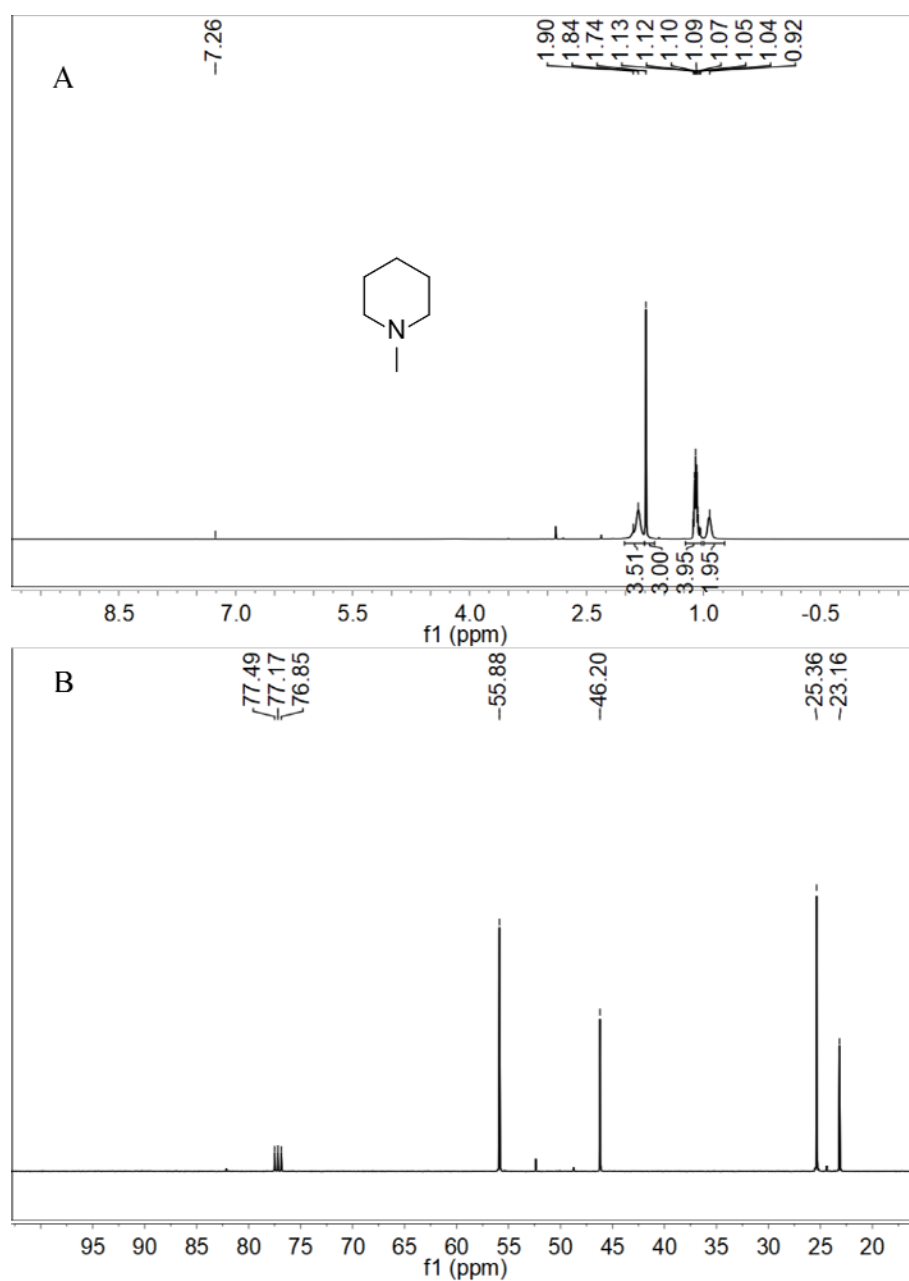

**Figure S22.**  $^1\text{H}$  NMR (A) and  $^{13}\text{C}$  NMR (B) spectra of N-methylpiperidine.

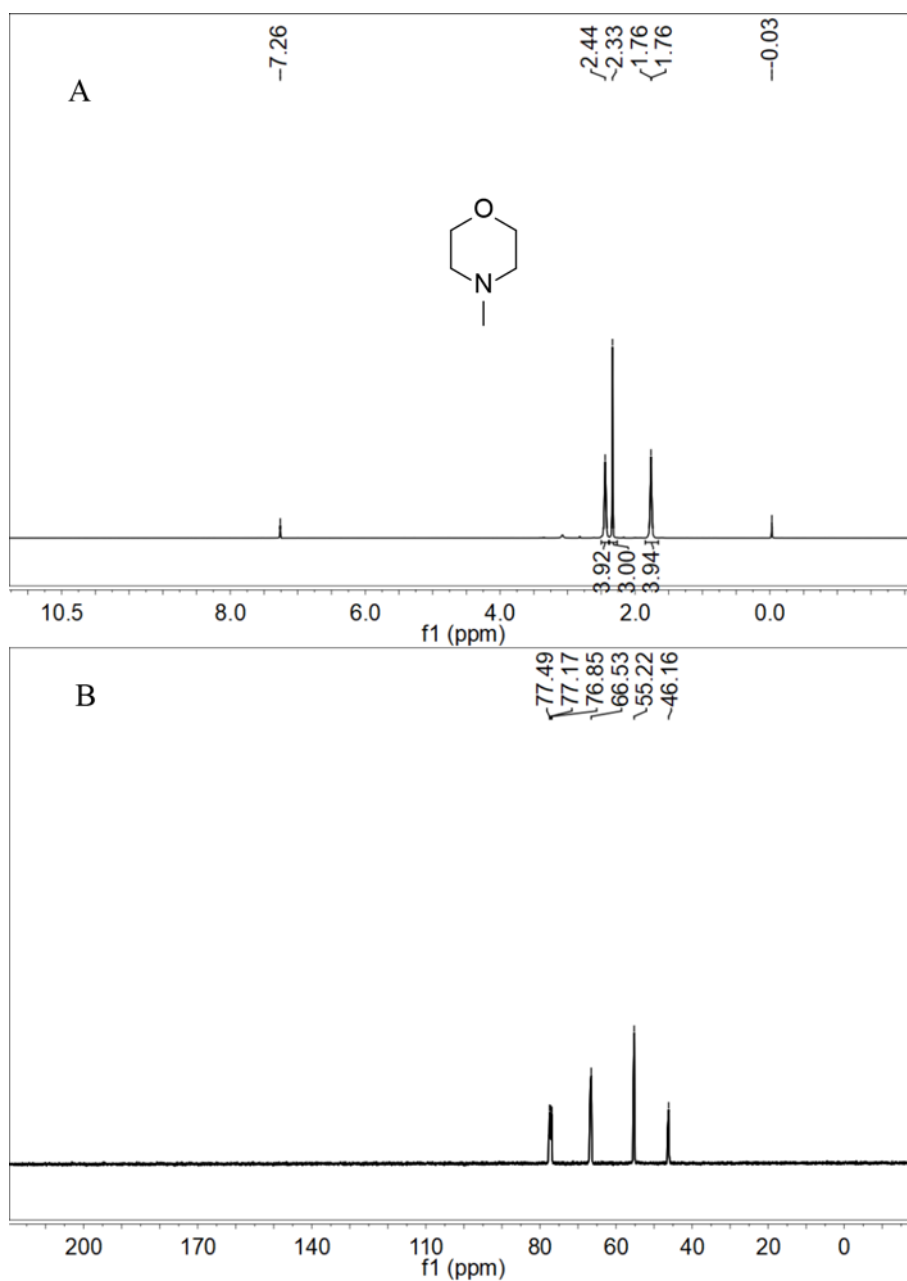

**Figure S23.**  $^1\text{H}$  NMR (A) and  $^{13}\text{C}$  NMR (B) spectra of 4-methyl-morpholine.

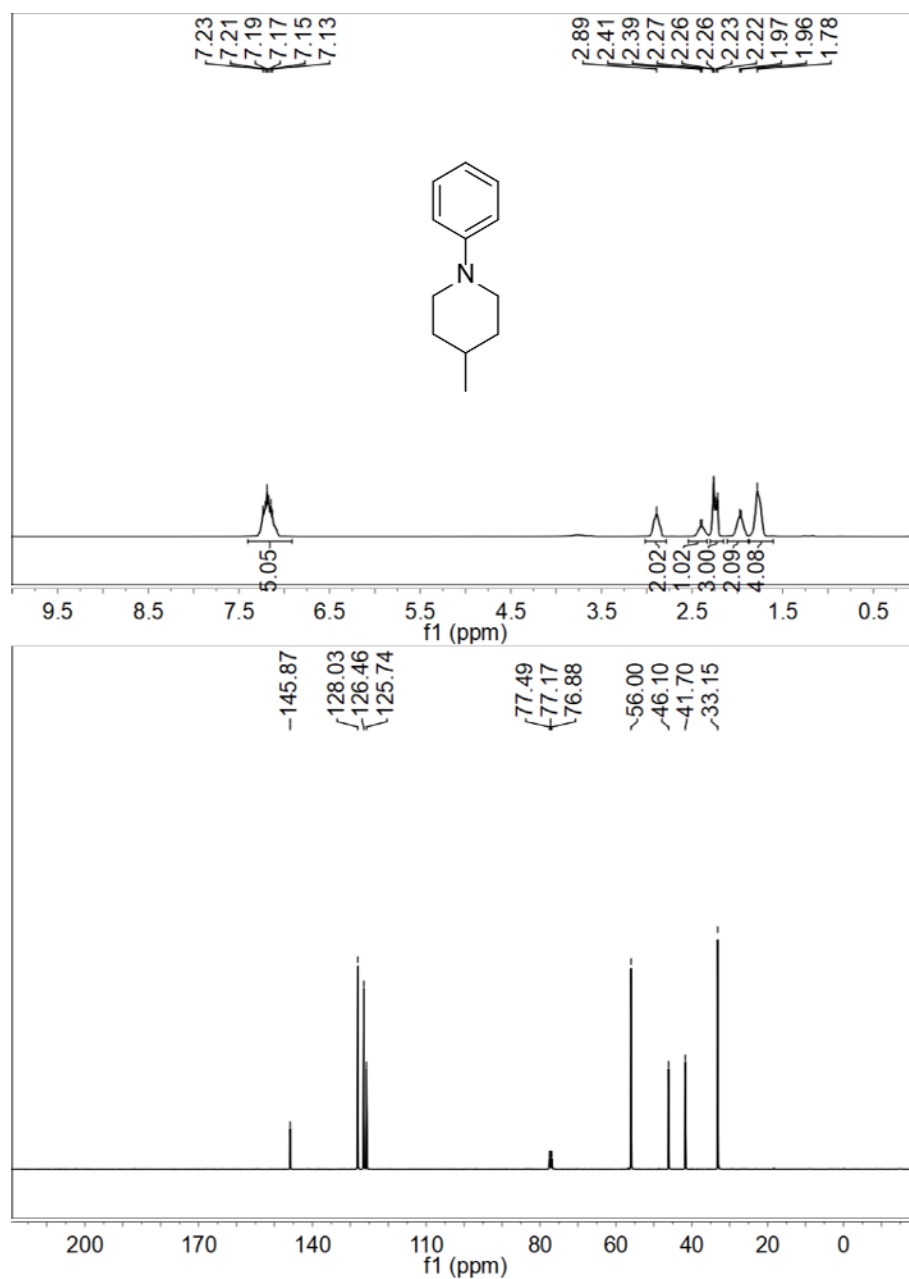

**Figure S24.**  $^1\text{H}$  NMR (A) and  $^{13}\text{C}$  NMR (B) spectra of 1-methyl-4-phenylpiperidine.

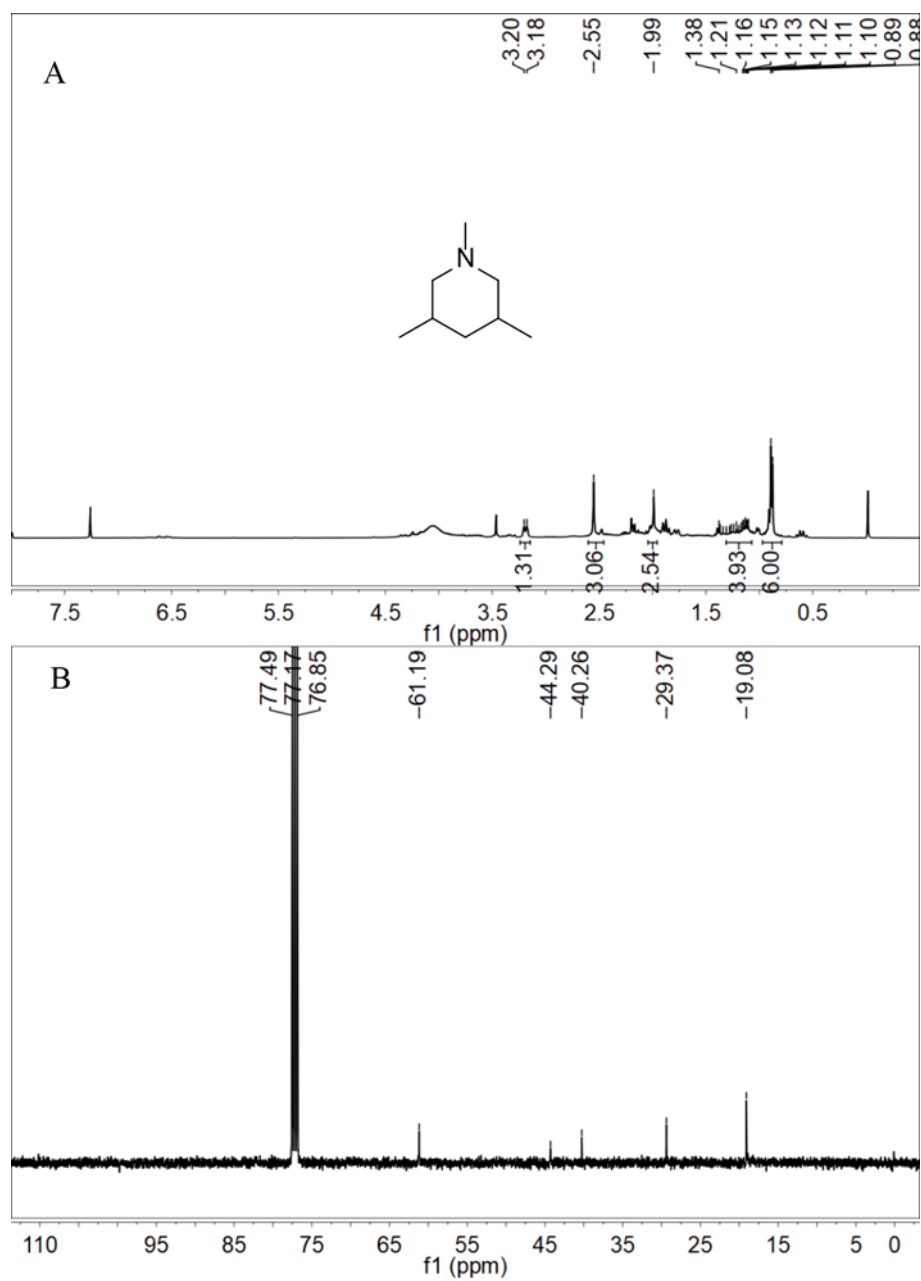

**Figure S25.**  $^1\text{H}$  NMR (A) and  $^{13}\text{C}$  NMR (B) spectra of 1,3,5-trimethylpiperidine.



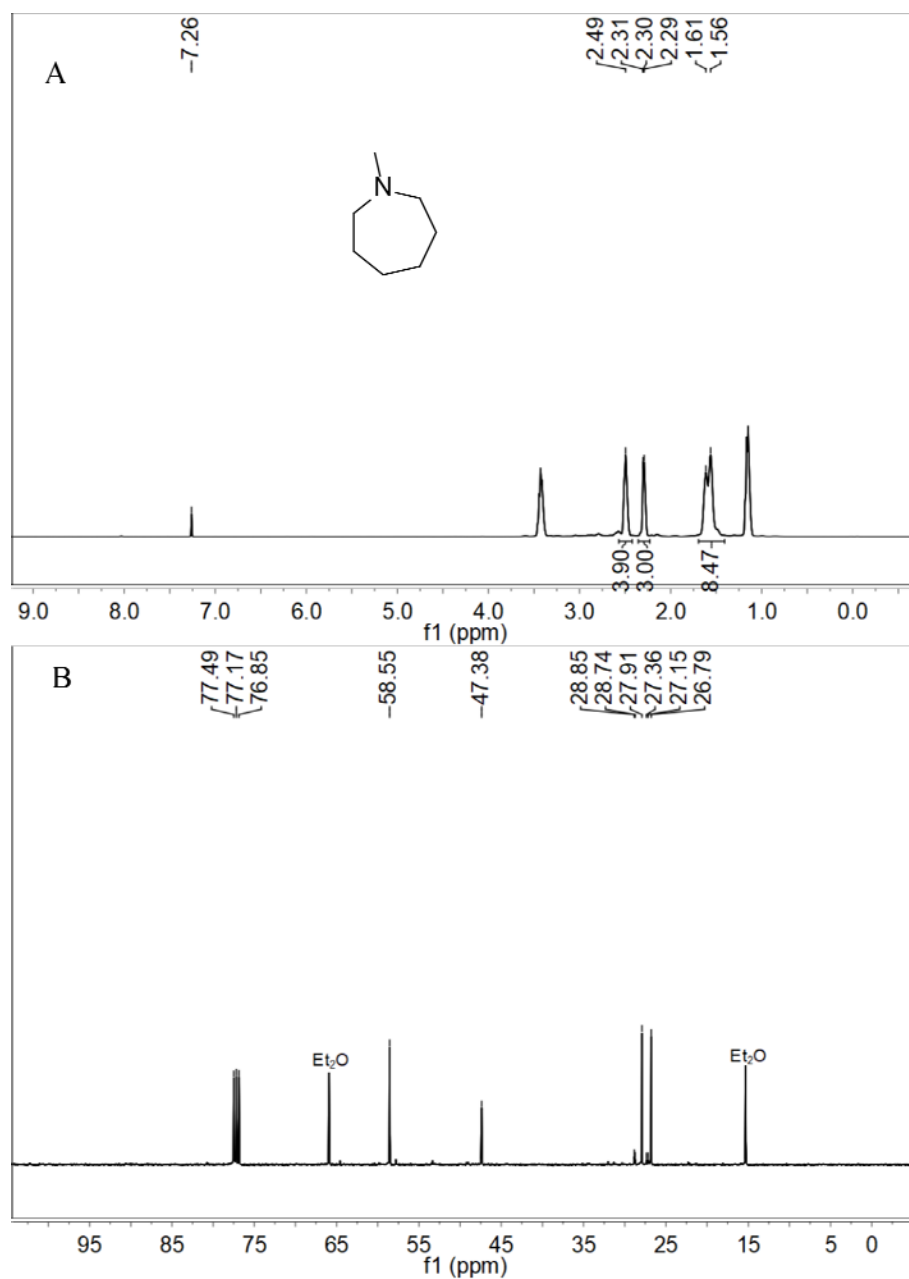

**Figure S26.**  $^1\text{H}$  NMR (A) and  $^{13}\text{C}$  NMR (B) spectra of hexahydro-1-methyl-1H-azepine.

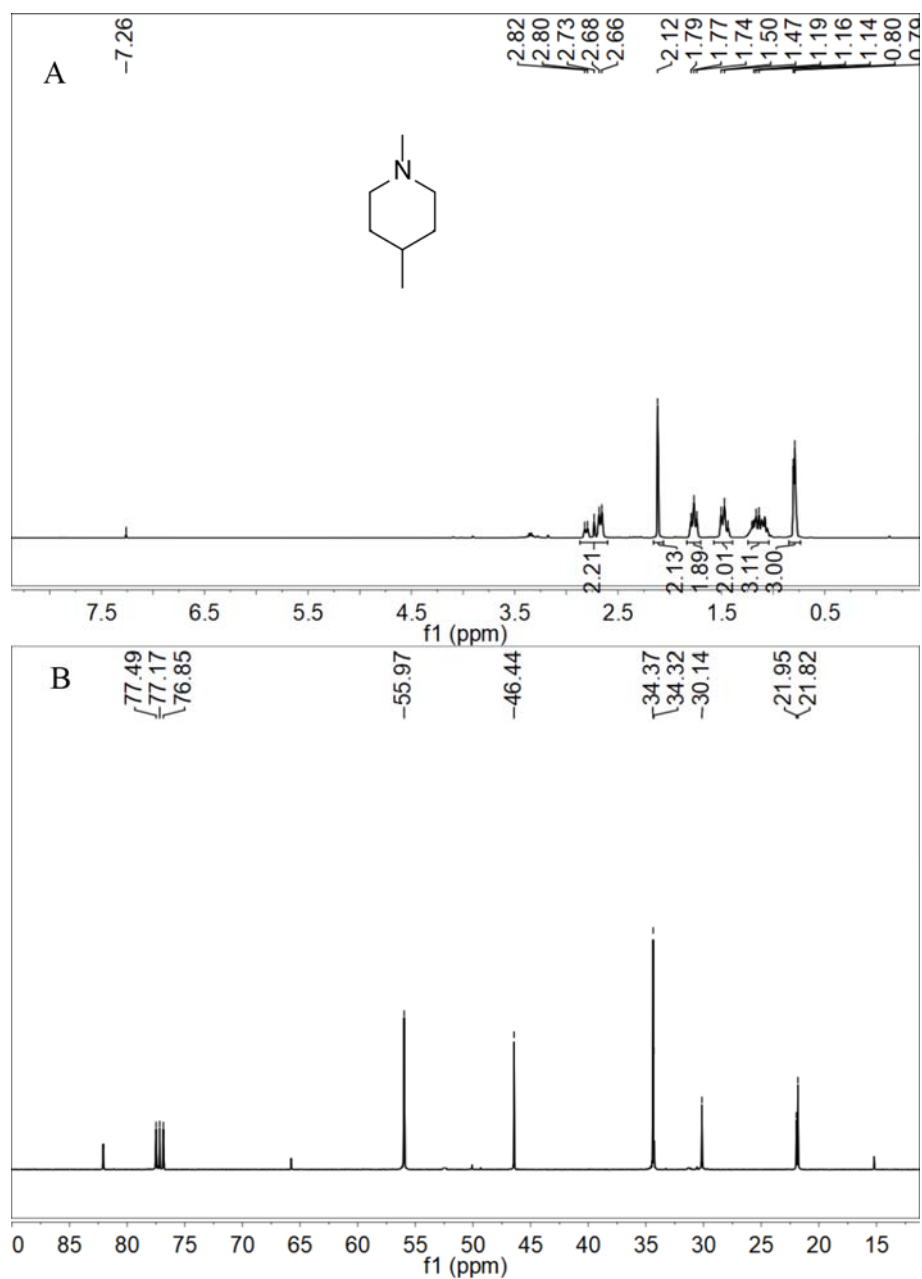

**Figure S27.**  $^1\text{H}$  NMR (A) and  $^{13}\text{C}$  NMR (B) spectra of 1,4-dimethylpiperidine.

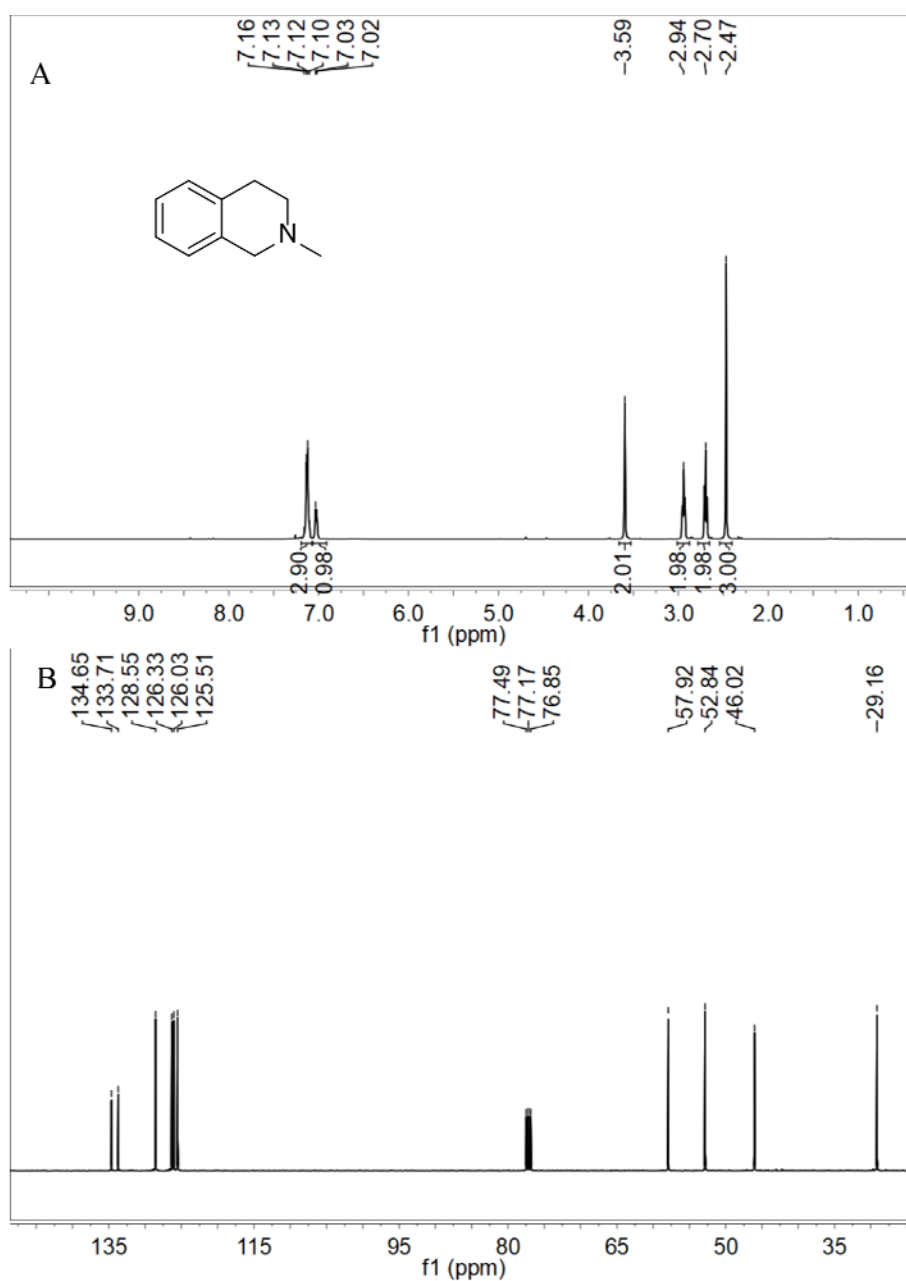

**Figure S28.** <sup>1</sup>H NMR (A) and <sup>13</sup>C NMR (B) spectra of 2-methyl-1,2,3,4-tetrahydroisoquinoline

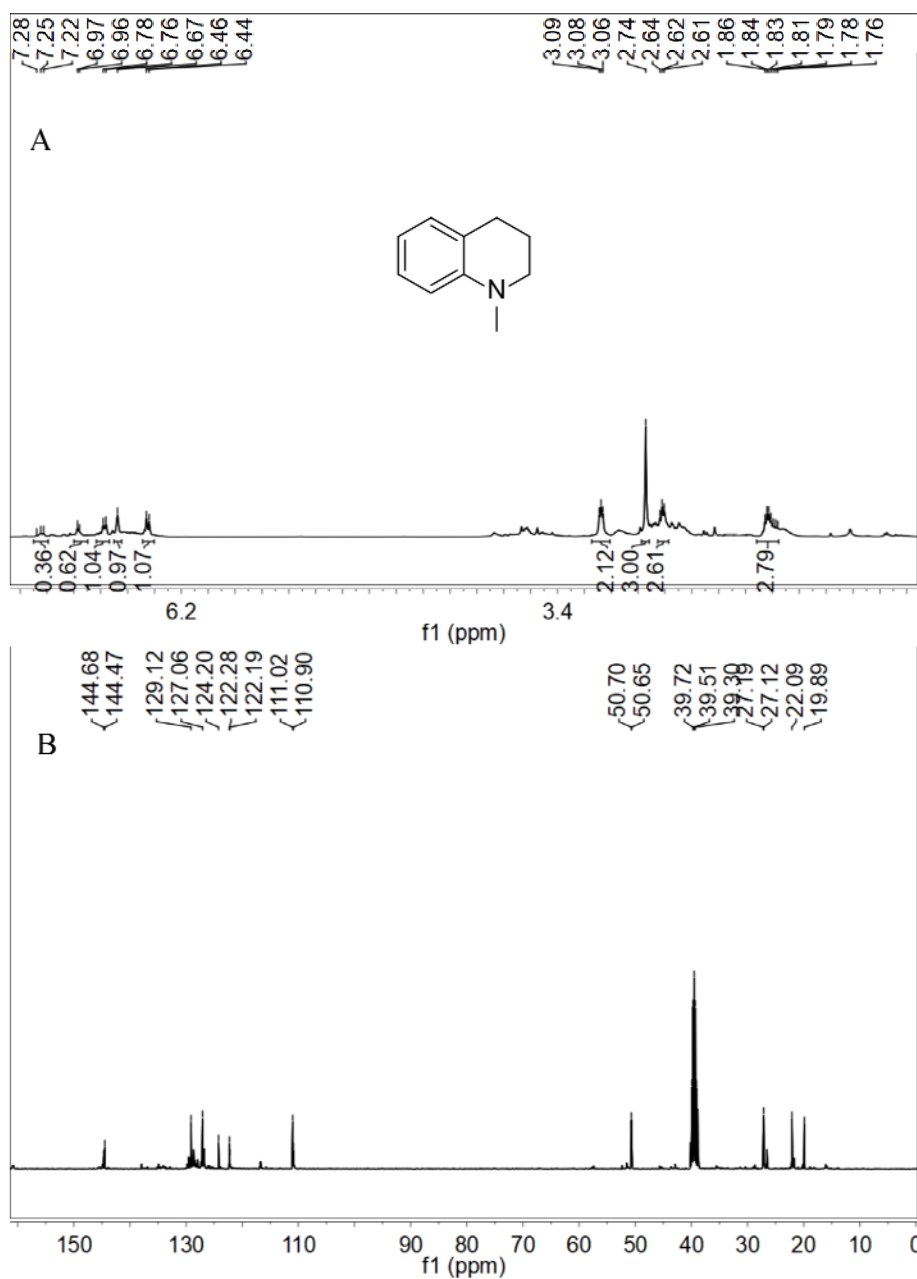

**Figure S29.**  $^1\text{H}$  NMR (A) and  $^{13}\text{C}$  NMR (B) spectra of N-methyl-1,2,3,4-tetrahydroquinoline.

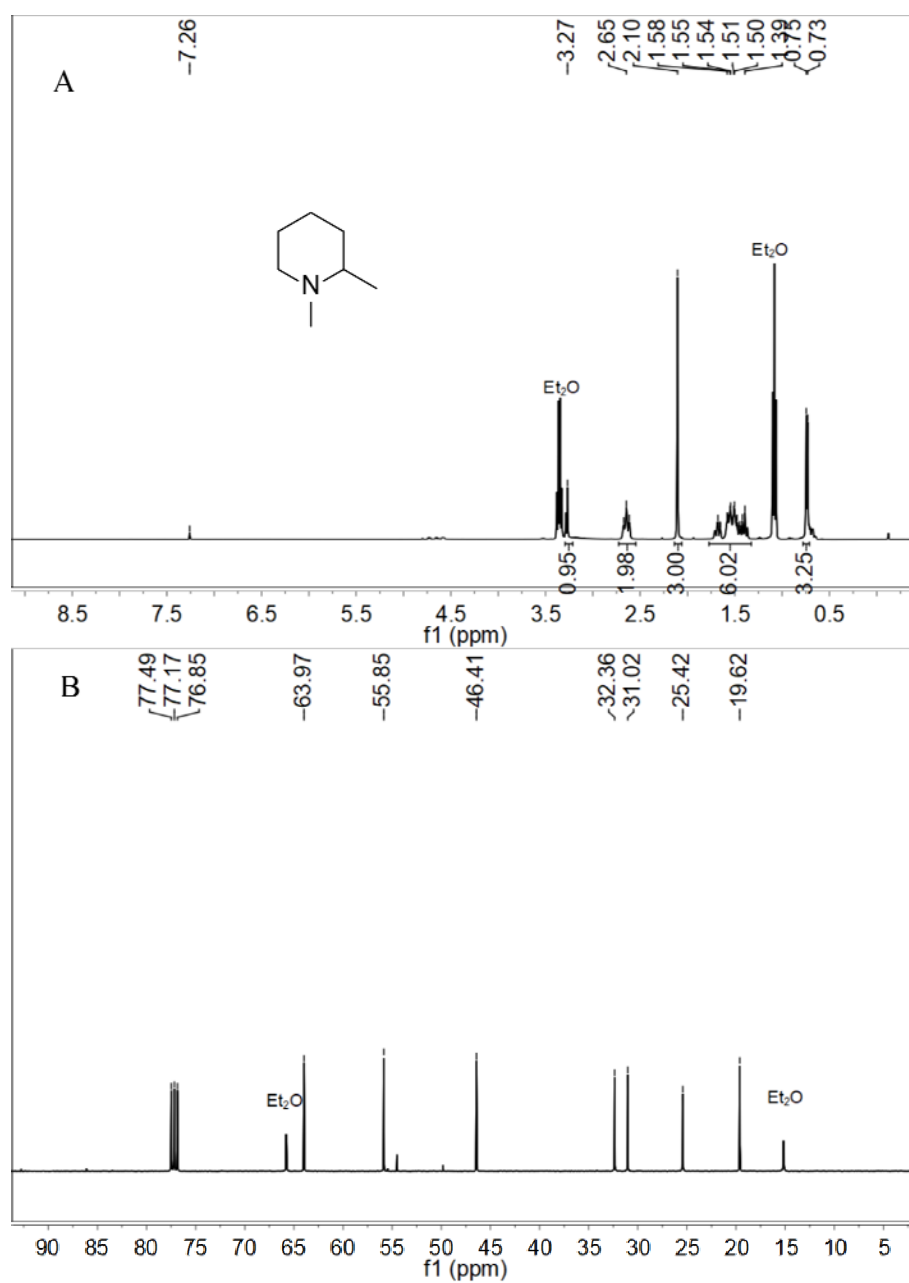

**Figure S30.** <sup>1</sup>H NMR (A) and <sup>13</sup>C NMR (B) spectra of 1,2-dimethylpiperidine.

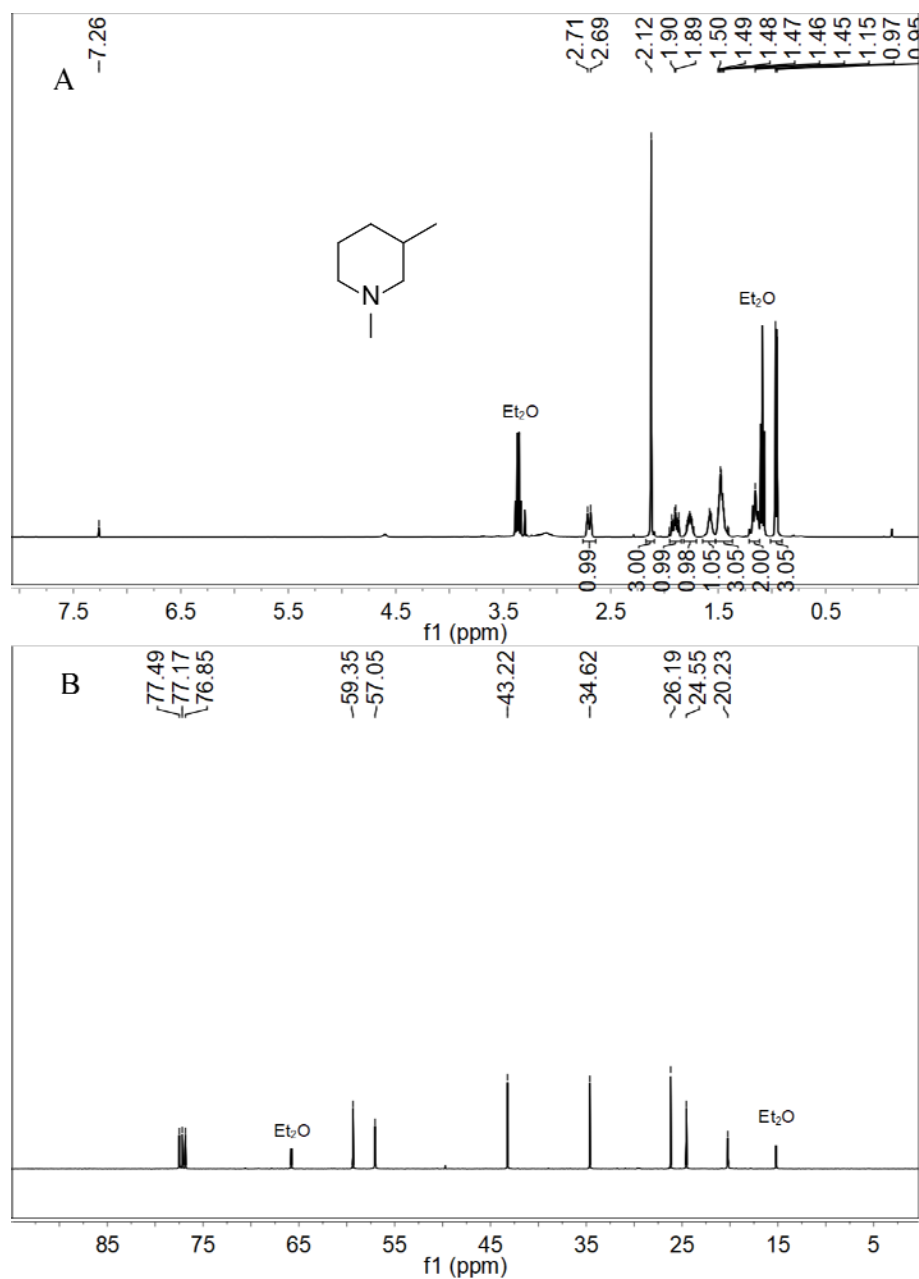

**Figure S31.** <sup>1</sup>H NMR (A) and <sup>13</sup>C NMR (B) spectra of 1,3-dimethylpiperidine.

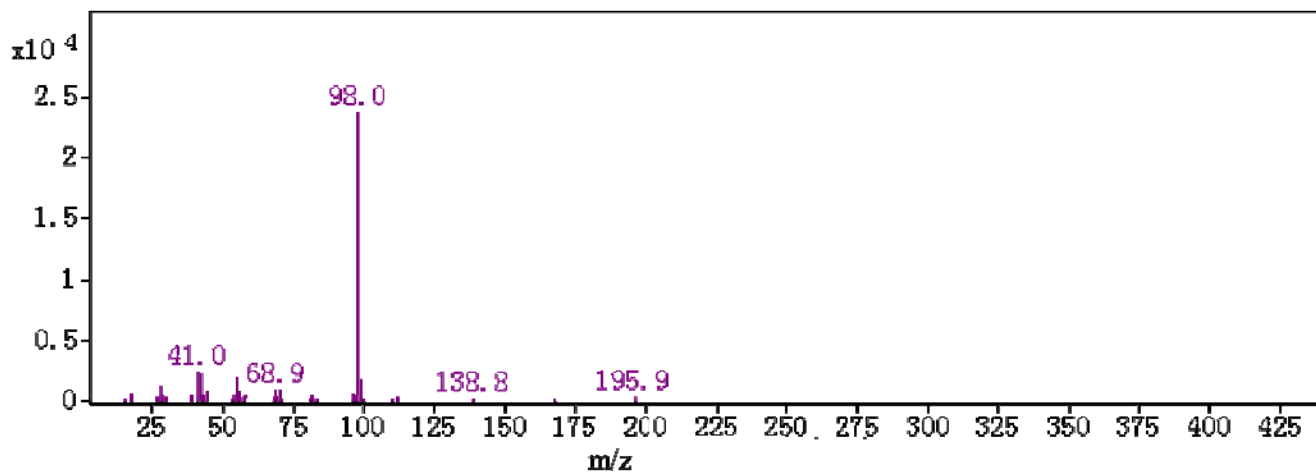

**Figure S32.** GC-MS spectrum of 1,2-bis(piperidine)ethane.

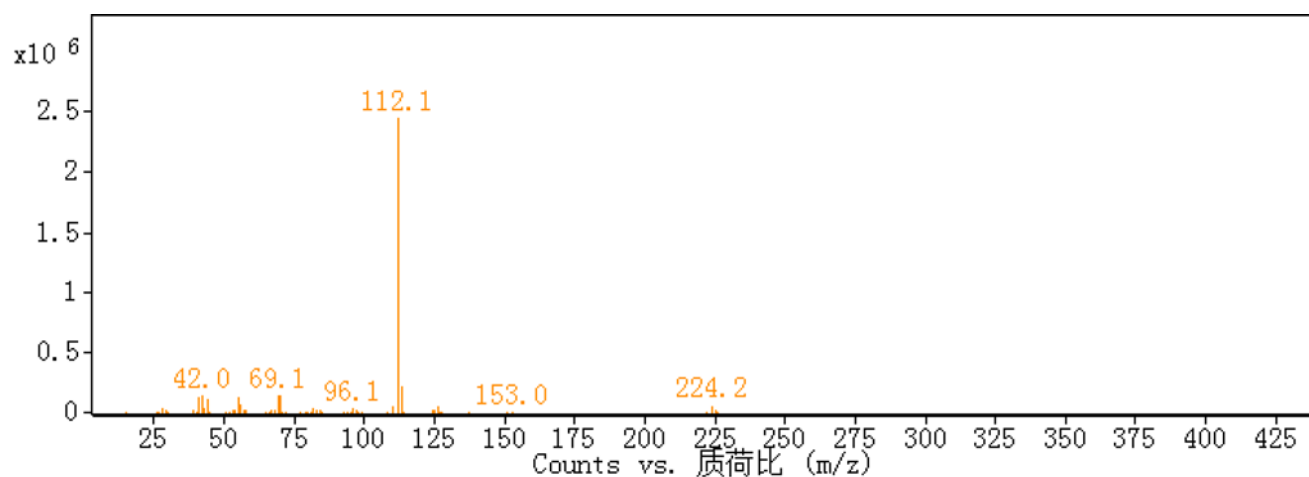

**Figure S33.** GC-MS spectrum of 1,2-bis(4-methylpiperidin-1-yl)ethane.

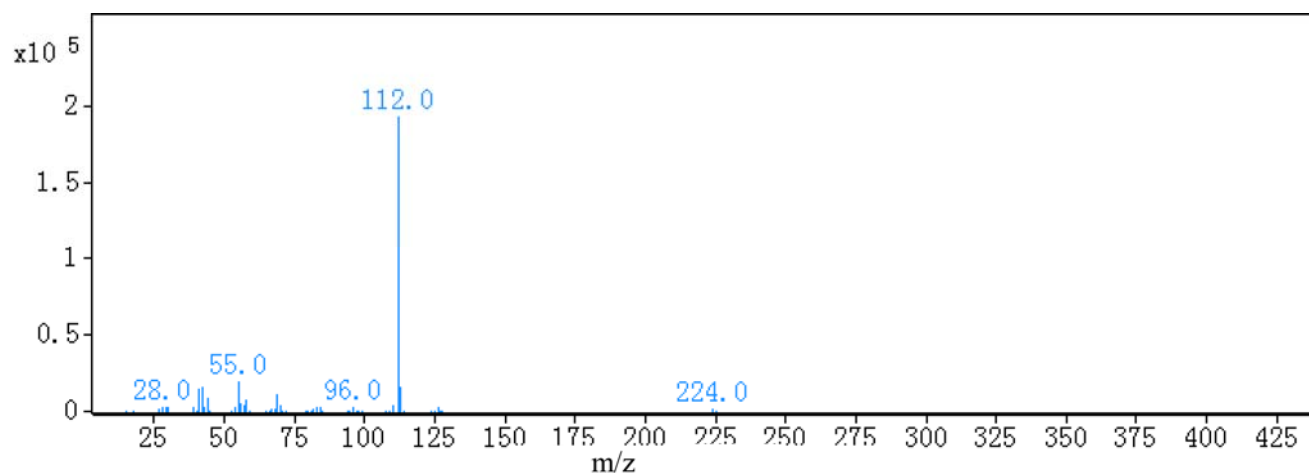

**Figure S34.** GC-MS spectrum of 1,2-bis(3-methylpiperidin-1-yl)ethane.

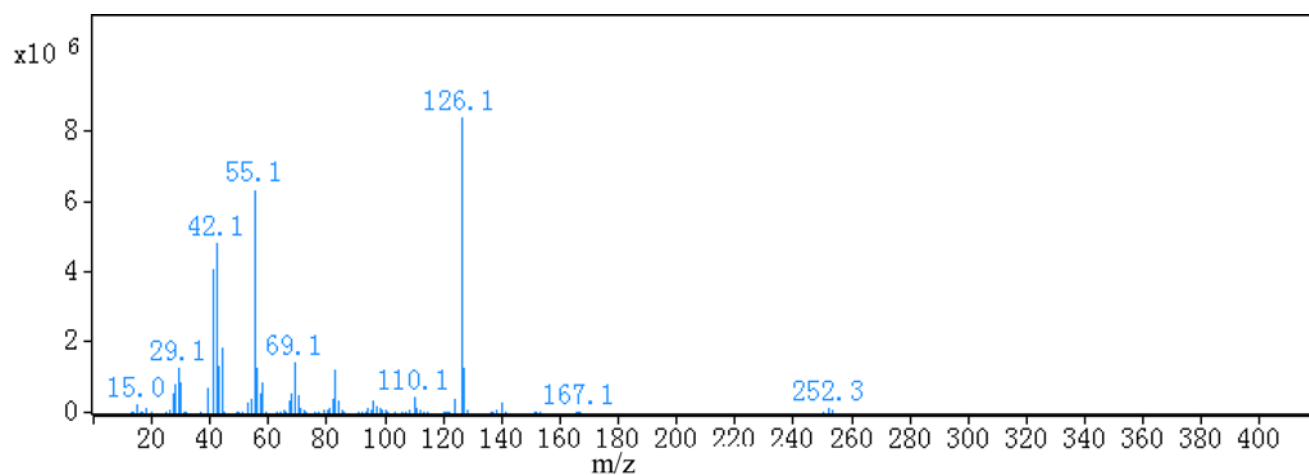

**Figure S35.** GC-MS spectrum of 1,2-bis(3,5-dimethylpiperidin-1-yl)ethane.

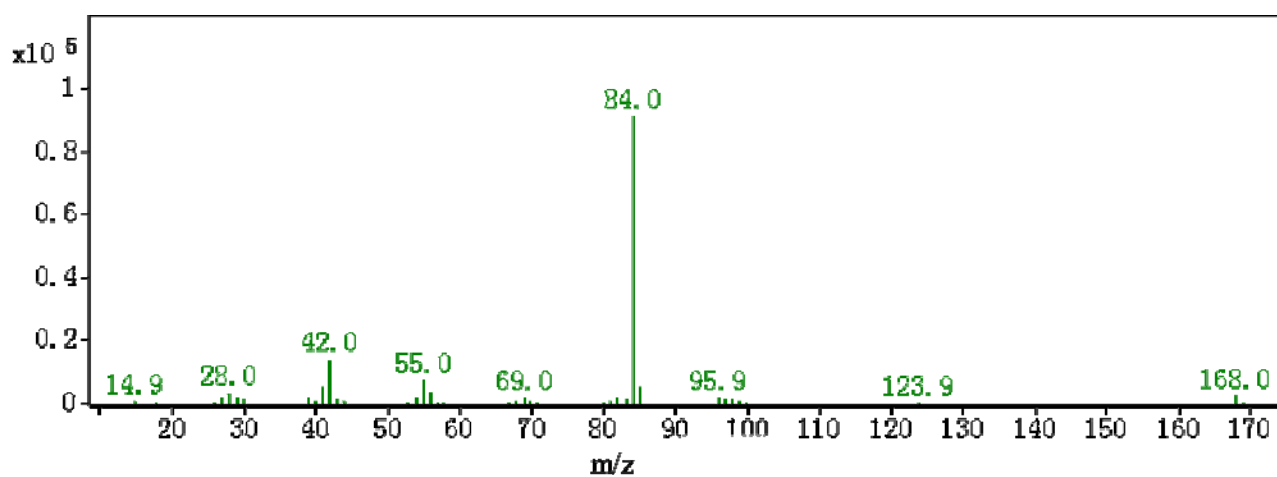

Figure S36. GC-MS spectrum of 1,2-di(pyrrolidin-1-yl)ethane

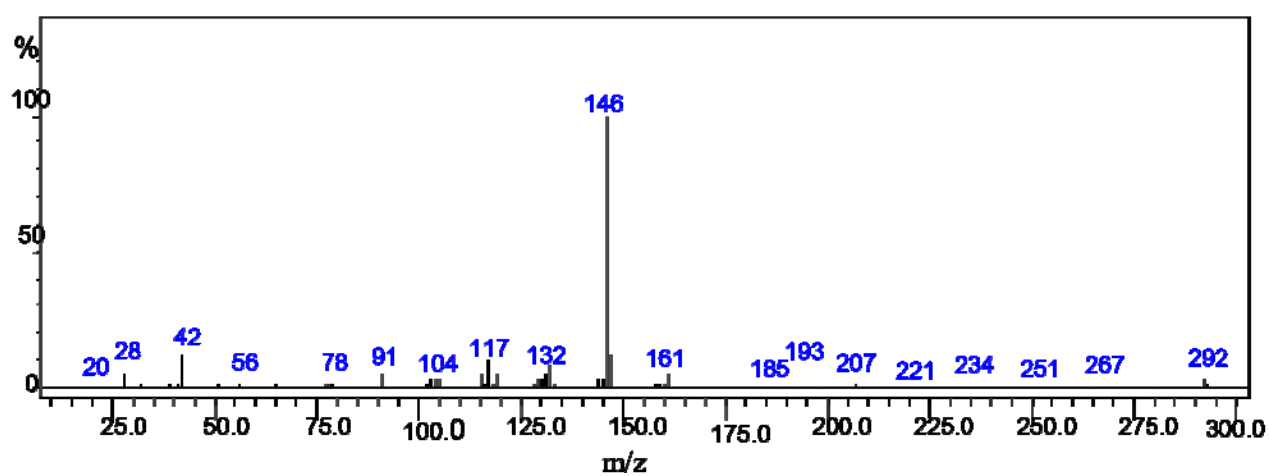

Figure S37. GC-MS spectrum of 1,2-bis-(3,4-dihydro-1H-[2]isoquinolyl)-ethane.

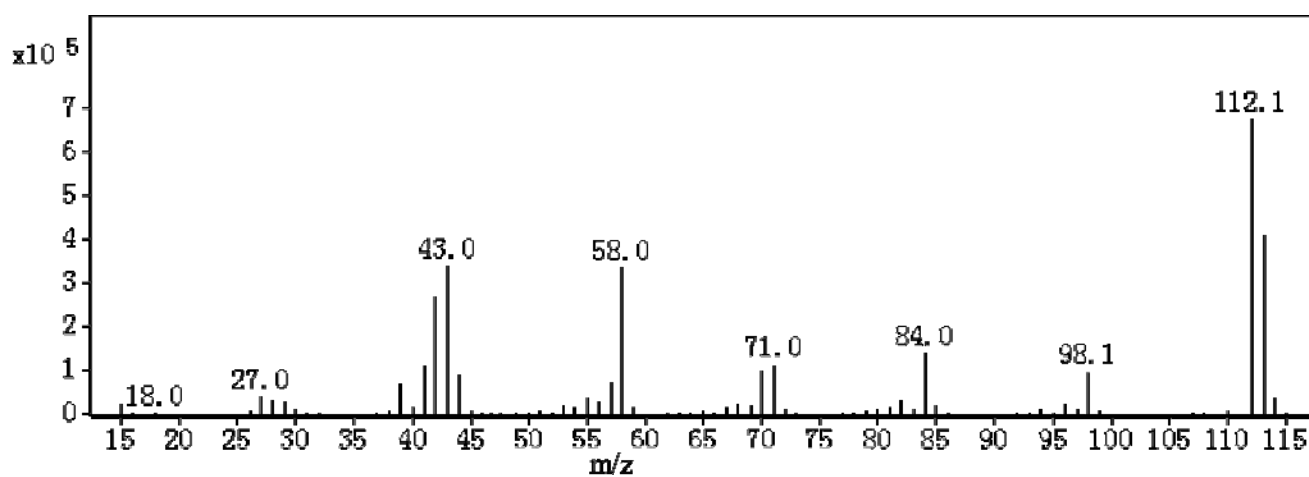

Figure S38. GC-MS spectrum of 1,3-dimethylpiperidine.



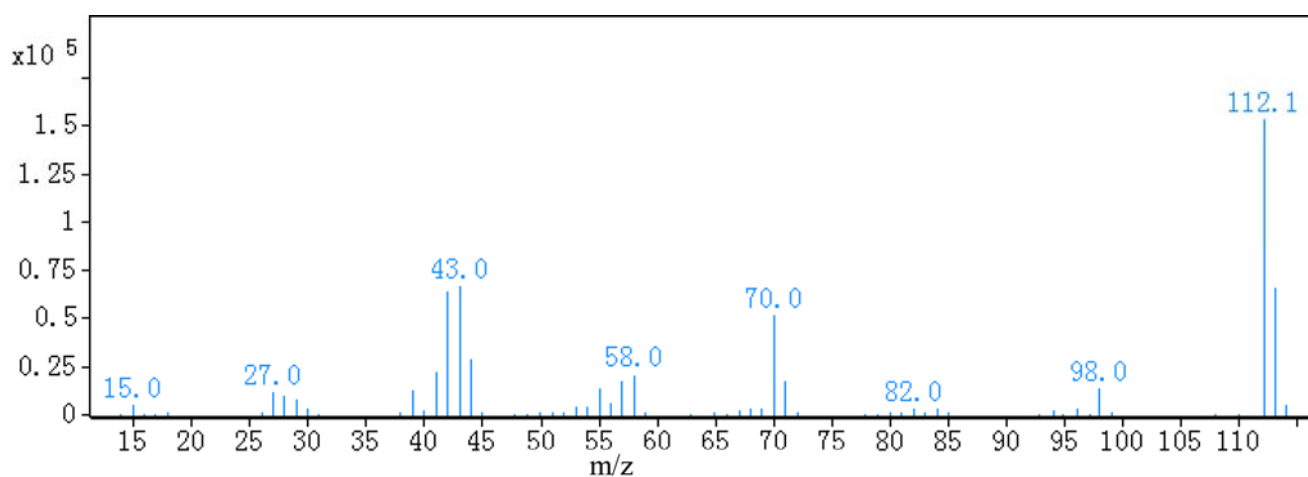

**Figure S39.** GC-MS spectrum of 1,4-dimethylpiperidine.

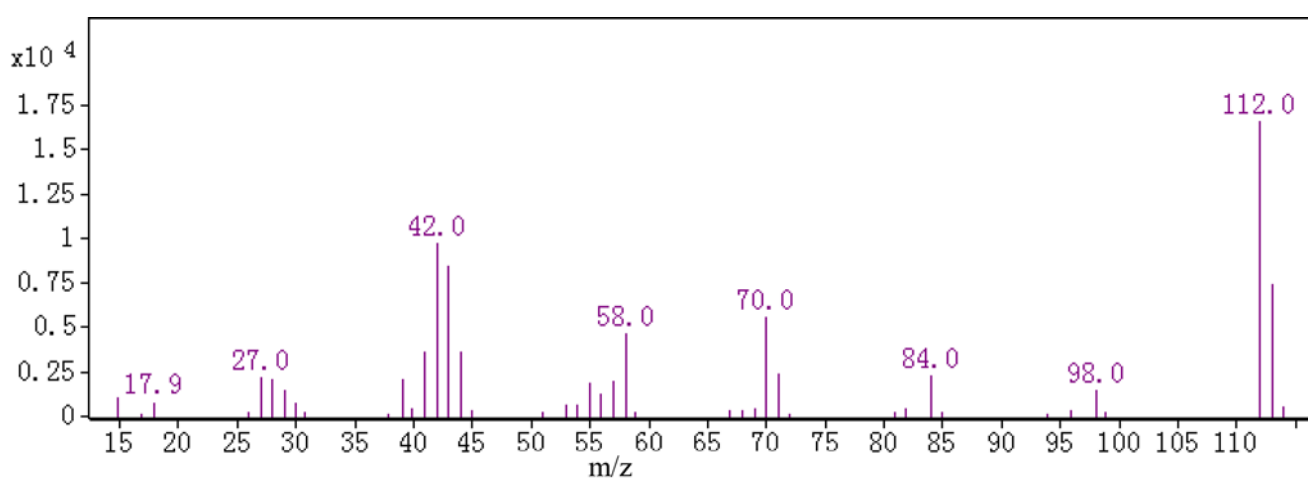

**Figure S40.** GC-MS spectrum of 1,2-dimethylpiperidine.

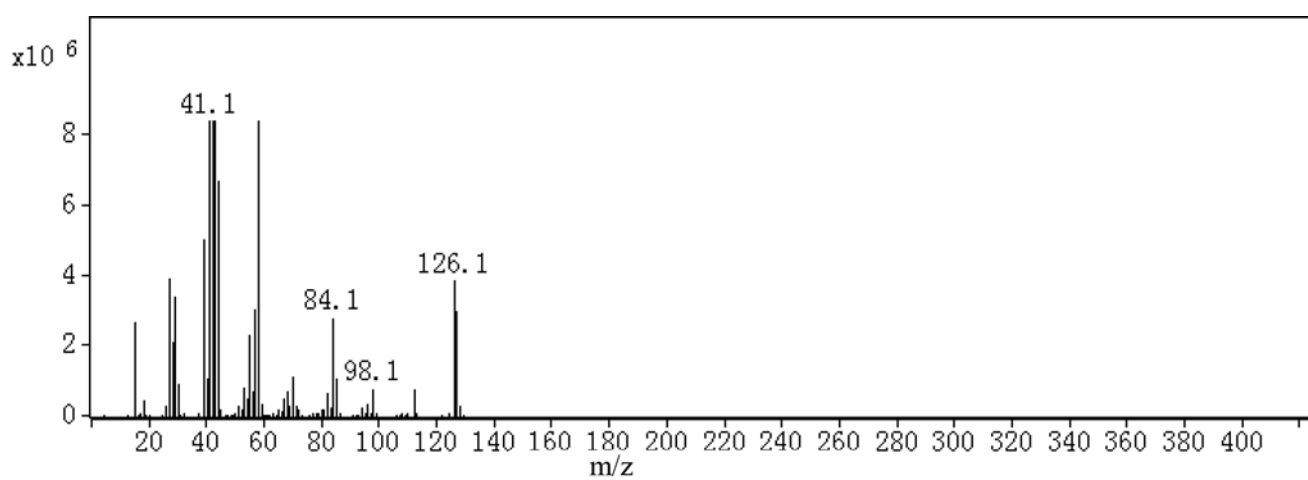

**Figure S41.** GC-MS spectrum of 1,3,5-trimethylpiperidine.

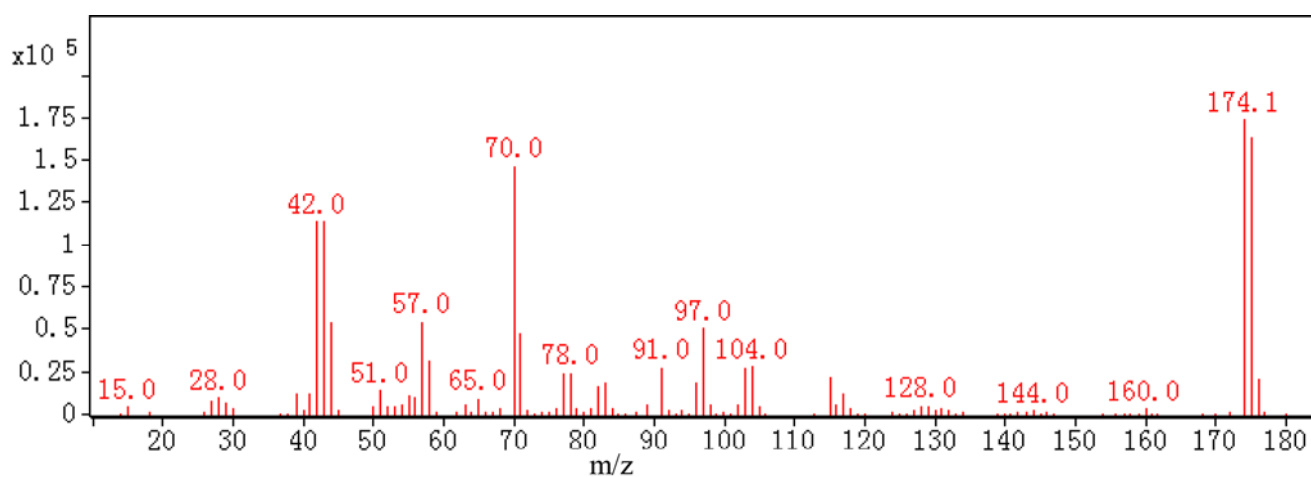

**Figure S42.** GC-MS spectrum of 1-methyl-4-phenylpiperidine.

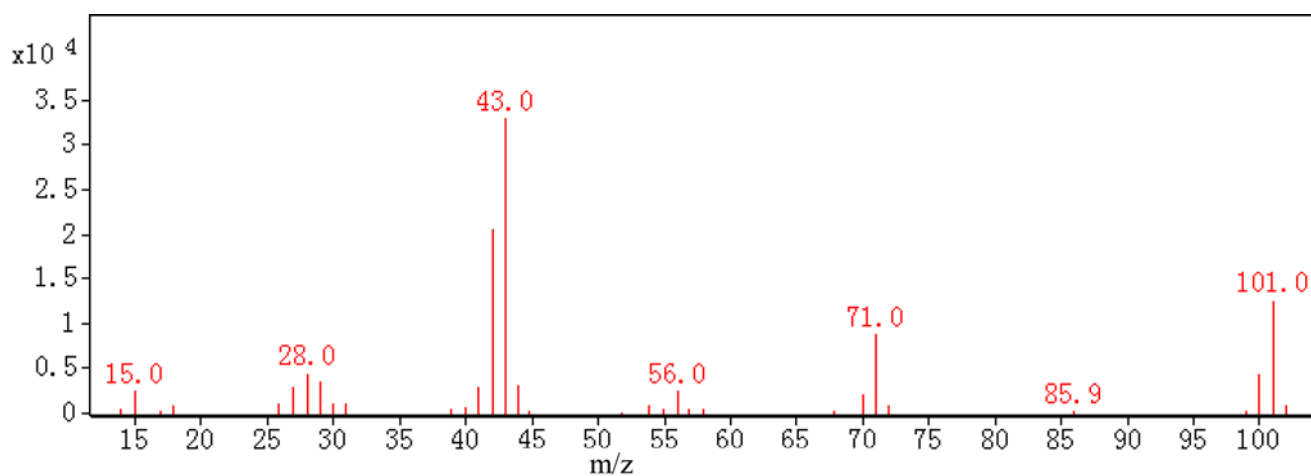

**Figure S43.** GC-MS spectrum of 4-methyl-morpholine.

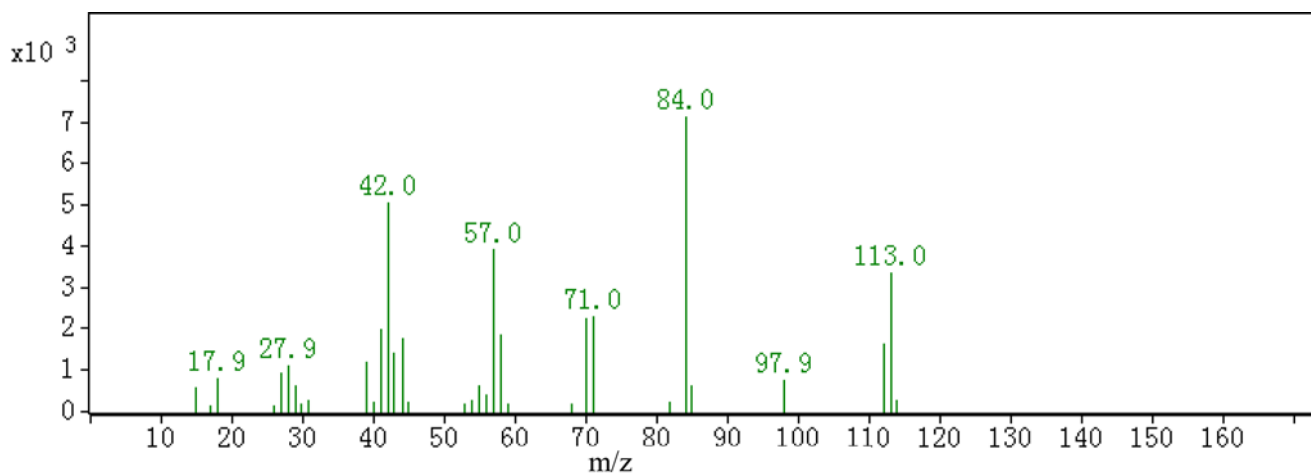

**Figure S44.** GC-MS spectrum of hexahydro-1-methyl-1H-azepine.

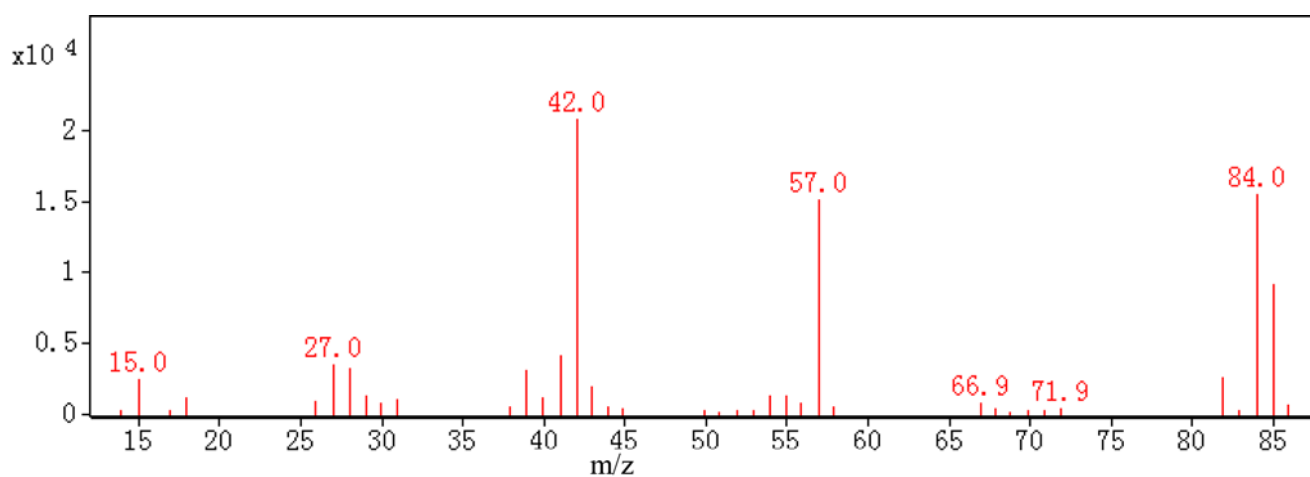

Figure S45. GC-MS spectrum of 1-methylpyrrolidine.

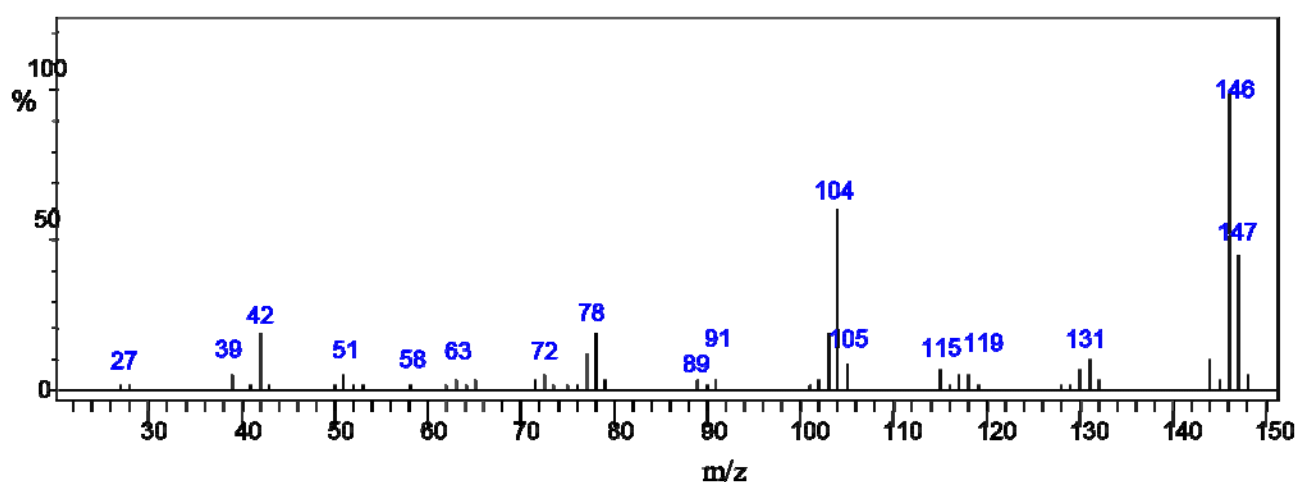

Figure S46. GC-MS spectrum of 2-methyl-1,2,3,4-tetrahydroisoquinoline.

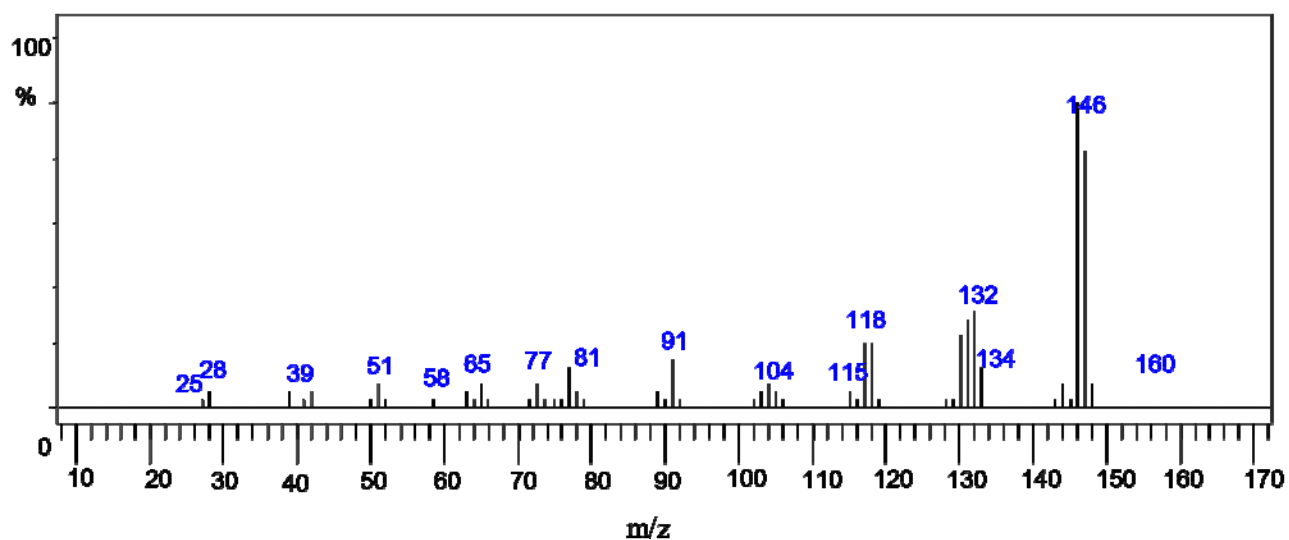

Figure S47. GC-MS spectrum of N-methyl-1,2,3,4-tetrahydroquinoline.
